# Supplementary material
Source: MDPI journal article supplement (https://www.mdpi.com/2073-4344/13/1/209)

# Diastereo- and Enantioselective Synthesis of Highly Functionalized Tetrahydropyridines by Recyclable Novel Bifunctional C<sub>2</sub>-Symmetric Ionic Liquid Supported (S)-Proline Organocatalyst

Prabhakara Madivalappa Davanagere<sup>1</sup>, Mrinmoy De<sup>2</sup>, Kaushik Chanda<sup>1</sup> and Barnali Maiti<sup>1,\*</sup>

<sup>1</sup>Department of Chemistry, School of Advanced Sciences, Vellore Institute of Technology, Vellore 632014, India.

<sup>2</sup>Department of Organic Chemistry, Indian Institute of Science, Bengaluru 560012, India.

\*Correspondence: barnali.m@vit.ac.in; barnalimaiti.m@gmail.com

## Table of Contents

|                                                                                                                                                      |           |
|------------------------------------------------------------------------------------------------------------------------------------------------------|-----------|
| <b>Figure S1.</b> <sup>1</sup> H NMR (400MHz) compound <b>1</b> in DMSO-d <sub>6</sub> .....                                                         | <b>5</b>  |
| <b>Figure S2.</b> <sup>13</sup> C NMR Spectrum (100MHz) of compound <b>1</b> in DMSO-d <sub>6</sub> .....                                            | <b>5</b>  |
| <b>Figure S3.</b> IR spectra of compound <b>1</b> .....                                                                                              | <b>6</b>  |
| <b>Figure S4.</b> GCMS spectra of compound <b>1</b> .....                                                                                            | <b>6</b>  |
| <b>Figure S5.</b> <sup>1</sup> H NMR (400MHz) compound <b>3</b> in DMSO-d <sub>6</sub> .....                                                         | <b>7</b>  |
| <b>Figure S6.</b> <sup>13</sup> C NMR (400MHz) compound <b>3</b> in DMSO-d <sub>6</sub> .....                                                        | <b>7</b>  |
| <b>Figure S7.</b> GCMS Spectrum of compound <b>3</b> .....                                                                                           | <b>8</b>  |
| <b>Figure S8.</b> <sup>1</sup> H NMR (400MHz) compound <b>4</b> in DMSO-d <sub>6</sub> .....                                                         | <b>9</b>  |
| <b>Figure S9.</b> <sup>13</sup> C NMR (400MHz) compound <b>4</b> in DMSO-d <sub>6</sub> .....                                                        | <b>9</b>  |
| <b>Figure S10.</b> IR spectra of compound <b>4</b> .....                                                                                             | <b>10</b> |
| <b>Figure S11.</b> GCMS Spectrum of compound <b>4</b> .....                                                                                          | <b>10</b> |
| <b>Figure S12.</b> <sup>1</sup> H NMR (400MHz) compound <b>6</b> in DMSO-d <sub>6</sub> .....                                                        | <b>11</b> |
| <b>Figure S13.</b> <sup>13</sup> C NMR (400MHz) compound <b>6</b> in DMSO-d <sub>6</sub> .....                                                       | <b>11</b> |
| <b>Figure S14.</b> IR Spectrum of compound <b>6</b> .....                                                                                            | <b>12</b> |
| <b>Figure S15.</b> <sup>1</sup> H NMR (400MHz) compound <b>7</b> in D <sub>2</sub> O.....                                                            | <b>13</b> |
| <b>Figure S16.</b> <sup>13</sup> C NMR (400MHz) compound <b>7</b> in D <sub>2</sub> O.....                                                           | <b>13</b> |
| <b>Figure S17.</b> IR spectra of compound <b>7</b> .....                                                                                             | <b>14</b> |
| <b>Figure S18.</b> Stepwise <sup>1</sup> H NMR spectrum for (S)-proline organocatalyst [BHEDIMP][CF <sub>3</sub> CO <sub>2</sub> ]<br><b>7</b> ..... | <b>15</b> |

|                                                                                                           |           |
|-----------------------------------------------------------------------------------------------------------|-----------|
| <b>Figure S19.</b> $^1\text{H}$ NMR (400 MHz) of compound <b>11a</b> in $\text{CDCl}_3$ .....             | <b>16</b> |
| <b>Figure S20.</b> $^{13}\text{C}$ NMR Spectrum (100 MHz) of compound <b>11a</b> in $\text{CDCl}_3$ ..... | <b>16</b> |
| <b>Figure S21.</b> HPLC Chromatogram of compound <b>11a</b> .....                                         | <b>17</b> |
| <b>Figure S22.</b> IR Spectrum of compound <b>11a</b> .....                                               | <b>17</b> |
| <b>Figure S23.</b> $^1\text{H}$ NMR (400 MHz) of compound <b>11b</b> in $\text{CDCl}_3$ .....             | <b>18</b> |
| <b>Figure S24.</b> $^{13}\text{C}$ NMR Spectrum (100 MHz) of compound <b>11b</b> in $\text{CDCl}_3$ ..... | <b>18</b> |
| <b>Figure S25.</b> HPLC Chromatogram of compound <b>11b</b> .....                                         | <b>19</b> |
| <b>Figure S26.</b> IR Spectrum of compound <b>11b</b> .....                                               | <b>19</b> |
| <b>Figure S27.</b> $^1\text{H}$ NMR (400 MHz) of compound <b>11c</b> in $\text{CDCl}_3$ .....             | <b>20</b> |
| <b>Figure S28.</b> $^{13}\text{C}$ NMR Spectrum (100 MHz) of compound <b>11c</b> in $\text{CDCl}_3$ ..... | <b>20</b> |
| <b>Figure S29.</b> HPLC Chromatogram of compound <b>11c</b> .....                                         | <b>21</b> |
| <b>Figure S30.</b> IR Spectrum of compound of <b>11c</b> .....                                            | <b>21</b> |
| <b>Figure S31.</b> $^1\text{H}$ NMR (400 MHz) of compound <b>11d</b> in $\text{CDCl}_3$ .....             | <b>22</b> |
| <b>Figure S32.</b> $^{13}\text{C}$ NMR Spectrum (100 MHz) of compound <b>11d</b> in $\text{CDCl}_3$ ..... | <b>22</b> |
| <b>Figure S33.</b> HPLC Chromatogram of compound <b>11d</b> .....                                         | <b>23</b> |
| <b>Figure S34.</b> IR Spectrum of compound <b>11d</b> .....                                               | <b>23</b> |
| <b>Figure S35.</b> $^1\text{H}$ NMR (400 MHz) of compound <b>11e</b> in $\text{CDCl}_3$ .....             | <b>24</b> |
| <b>Figure S36.</b> $^{13}\text{C}$ NMR Spectrum (100 MHz) of compound <b>11e</b> in $\text{CDCl}_3$ ..... | <b>24</b> |
| <b>Figure S37.</b> HPLC Chromatogram of compound <b>11e</b> .....                                         | <b>25</b> |
| <b>Figure S38.</b> IR Spectrum of compound <b>11e</b> .....                                               | <b>25</b> |
| <b>Figure S39.</b> $^1\text{H}$ NMR (400 MHz) of compound <b>11f</b> in $\text{CDCl}_3$ .....             | <b>26</b> |
| <b>Figure S40.</b> $^{13}\text{C}$ NMR Spectrum (100 MHz) of compound <b>11f</b> in $\text{CDCl}_3$ ..... | <b>26</b> |
| <b>Figure S41.</b> HPLC Chromatogram of compound <b>11f</b> .....                                         | <b>27</b> |
| <b>Figure S42.</b> $^1\text{H}$ NMR (400 MHz) of compound <b>11g</b> in $\text{CDCl}_3$ .....             | <b>28</b> |
| <b>Figure S43.</b> $^{13}\text{C}$ NMR Spectrum (100 MHz) of compound <b>11g</b> in $\text{CDCl}_3$ ..... | <b>28</b> |
| <b>Figure S44.</b> HPLC Chromatogram of compound <b>11g</b> .....                                         | <b>29</b> |
| <b>Figure S45.</b> IR Spectrum of compound <b>11g</b> .....                                               | <b>29</b> |
| <b>Figure S46.</b> $^1\text{H}$ NMR (400 MHz) of compound <b>11h</b> in $\text{CDCl}_3$ .....             | <b>30</b> |
| <b>Figure S47.</b> $^{13}\text{C}$ NMR Spectrum (100 MHz) of compound <b>11h</b> in $\text{CDCl}_3$ ..... | <b>30</b> |
| <b>Figure S48.</b> HPLC Chromatogram of compound <b>11h</b> .....                                         | <b>31</b> |

|                                                                                                           |           |
|-----------------------------------------------------------------------------------------------------------|-----------|
| <b>Figure S49.</b> IR Spectrum of compound <b>11h</b> .....                                               | <b>31</b> |
| <b>Figure S50.</b> $^1\text{H}$ NMR (400 MHz) of compound <b>11i</b> in $\text{CDCl}_3$ .....             | <b>32</b> |
| <b>Figure S51.</b> $^{13}\text{C}$ NMR Spectrum (100 MHz) of compound <b>11i</b> in $\text{CDCl}_3$ ..... | <b>32</b> |
| <b>Figure S52.</b> HPLC Chromatogram of compound <b>11i</b> .....                                         | <b>33</b> |
| <b>Figure S53.</b> IR Spectrum of compound <b>11i</b> .....                                               | <b>33</b> |
| <b>Figure S54.</b> $^1\text{H}$ NMR (400 MHz) of compound <b>11j</b> in $\text{CDCl}_3$ .....             | <b>34</b> |
| <b>Figure S55.</b> $^{13}\text{C}$ NMR Spectrum (100 MHz) of compound <b>11j</b> in $\text{CDCl}_3$ ..... | <b>34</b> |
| <b>Figure S56.</b> HPLC Chromatogram of compound <b>11j</b> .....                                         | <b>35</b> |
| <b>Figure S57.</b> IR Spectrum of compound <b>11j</b> .....                                               | <b>35</b> |
| <b>Figure S58.</b> $^1\text{H}$ NMR (400 MHz) of compound <b>11k</b> in $\text{CDCl}_3$ .....             | <b>36</b> |
| <b>Figure S59.</b> $^{13}\text{C}$ NMR Spectrum (100 MHz) of compound <b>11k</b> in $\text{CDCl}_3$ ..... | <b>36</b> |
| <b>Figure S60.</b> HPLC Chromatogram of compound <b>11k</b> .....                                         | <b>37</b> |
| <b>Figure S61.</b> IR Spectrum of compound <b>11k</b> .....                                               | <b>37</b> |
| <b>Figure S62.</b> $^1\text{H}$ NMR (400 MHz) of compound <b>11l</b> in $\text{CDCl}_3$ .....             | <b>38</b> |
| <b>Figure S63.</b> $^{13}\text{C}$ NMR Spectrum (100 MHz) of compound <b>11l</b> in $\text{CDCl}_3$ ..... | <b>38</b> |
| <b>Figure S64.</b> HPLC Chromatogram of compound <b>11l</b> .....                                         | <b>39</b> |
| <b>Figure S65.</b> IR Spectrum of compound <b>11k</b> .....                                               | <b>39</b> |
| <b>Figure S66.</b> $^1\text{H}$ NMR (400 MHz) of compound <b>11m</b> in $\text{CDCl}_3$ .....             | <b>40</b> |
| <b>Figure S67.</b> $^{13}\text{C}$ NMR Spectrum (100 MHz) of compound <b>11m</b> in $\text{CDCl}_3$ ..... | <b>40</b> |
| <b>Figure S68.</b> HPLC Chromatogram of compound <b>11m</b> .....                                         | <b>41</b> |
| <b>Figure S69.</b> IR Spectrum of compound <b>11m</b> .....                                               | <b>41</b> |
| <b>Figure S70.</b> $^1\text{H}$ NMR (400 MHz) of compound <b>11n</b> in $\text{CDCl}_3$ .....             | <b>42</b> |
| <b>Figure S71.</b> $^{13}\text{C}$ NMR Spectrum (100 MHz) of compound <b>11n</b> in $\text{CDCl}_3$ ..... | <b>42</b> |
| <b>Figure S72.</b> HPLC Chromatogram of compound <b>11n</b> .....                                         | <b>43</b> |
| <b>Figure S73.</b> IR Spectrum of compound <b>11n</b> .....                                               | <b>43</b> |
| <b>Figure S74.</b> $^1\text{H}$ NMR (400 MHz) of compound <b>11o</b> in $\text{CDCl}_3$ .....             | <b>44</b> |

|                                                                                                           |           |
|-----------------------------------------------------------------------------------------------------------|-----------|
| <b>Figure S75.</b> $^{13}\text{C}$ NMR Spectrum (100 MHz) of compound <b>11o</b> in $\text{CDCl}_3$ ..... | <b>44</b> |
| <b>Figure S76.</b> HPLC Chromatogram of compound <b>11o</b> .....                                         | <b>45</b> |
| <b>Figure S77.</b> IR Spectrum of compound <b>11o</b> .....                                               | <b>45</b> |

Signature SIF VIT VELLORE  
DI-IMI

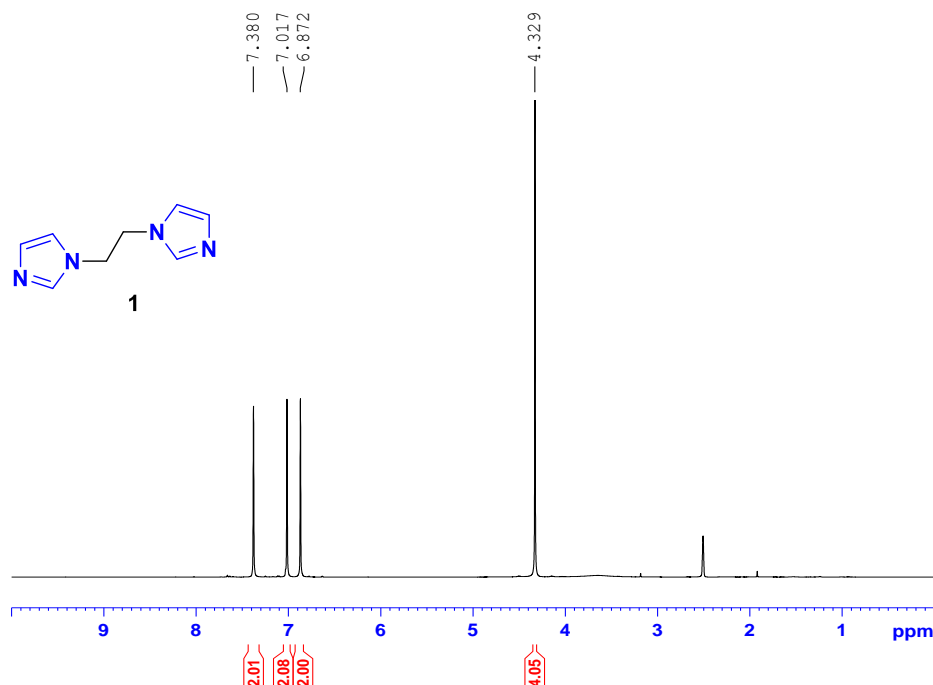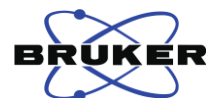

Current Data Parameters  
NAME Di-IMI (1)  
EXPNO 18  
PROCNO 1

F2 - Acquisition Parameters  
Date\_ 20181210  
Time\_ 18.46 h  
INSTRUM spect  
PROBHD Z108618\_0505 (N  
PULPROG zg30  
TD 65536  
SOLVENT DMSO  
NS 16  
DS 2  
SWH 8012.820 Hz  
FIDRES 0.244532 Hz  
AQ 4.0894465 sec  
RG 58.47  
DW 62.400 usec  
DE 6.50 usec  
TE 297.0 K  
D1 1.00000000 sec  
TD0 1  
SFO1 400.2604716 MHz  
NUC1 1H  
PI 14.00 usec  
PLW1 16.00000000 W

F2 - Processing parameters  
SI 65536  
SF 400.2500000 MHz  
WDW EM  
SSB 0  
LB 0.30 Hz  
GB 0  
PC 1.00

**Figure S1.**  $^1\text{H}$ NMR (400MHz) compound **1** in  $\text{DMSO-d}_6$

Signature SIF VIT VELLORE  
DI-IMI

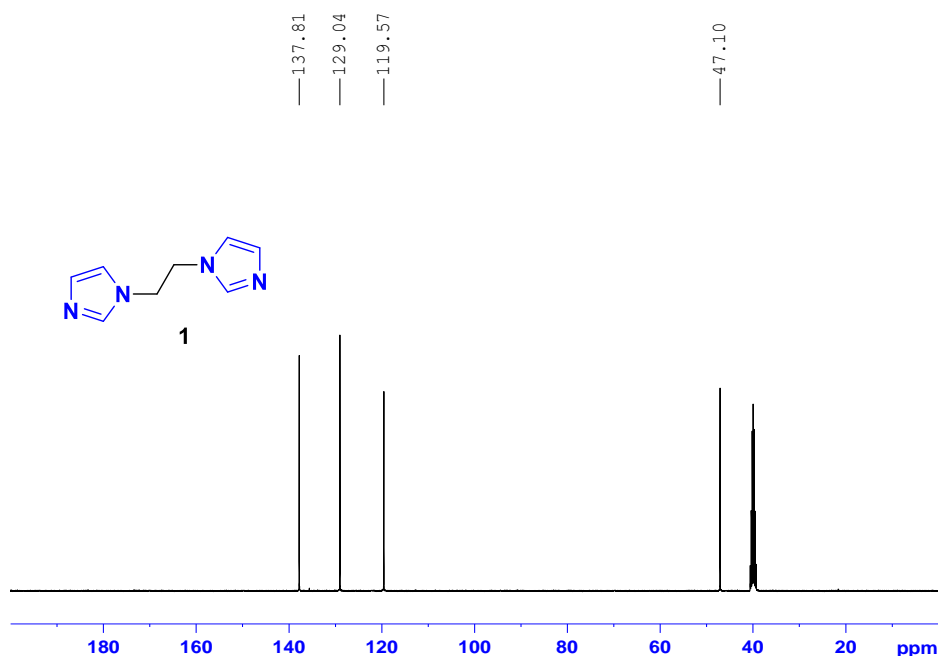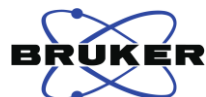

Current Data Parameters  
NAME Di-IMI (1)  
EXPNO 19  
PROCNO 1

F2 - Acquisition Parameters  
Date\_ 20181210  
Time\_ 19.17 h  
INSTRUM spect  
PROBHD Z108618\_0505 (N  
PULPROG zgpg30  
TD 65536  
SOLVENT DMSO  
NS 512  
DS 4  
SWH 24038.461 Hz  
FIDRES 0.733596 Hz  
AQ 1.3631488 sec  
RG 156.91  
DW 20.800 usec  
DE 6.50 usec  
TE 297.7 K  
D1 2.00000000 sec  
D11 0.03000000 sec  
TD0 1  
SFO1 100.6550186 MHz  
NUC1 13C  
PI 9.80 usec  
PLW1 58.00000000 W  
SFO2 400.2596010 MHz  
NUC2 1H  
CPDPRG[2] waltz16  
PCPD2 90.00 usec  
PLW2 16.00000000 W  
PLW12 0.38716000 W  
PLW13 0.19474000 W

F2 - Processing parameters  
SI 32768  
SF 100.6449542 MHz  
WDW EM  
SSB 0  
LB 1.00 Hz  
GB 0  
PC 1.40

**Figure S2.**  $^{13}\text{C}$  NMR Spectrum (100MHz) of compound **1** in  $\text{DMSO-d}_6$

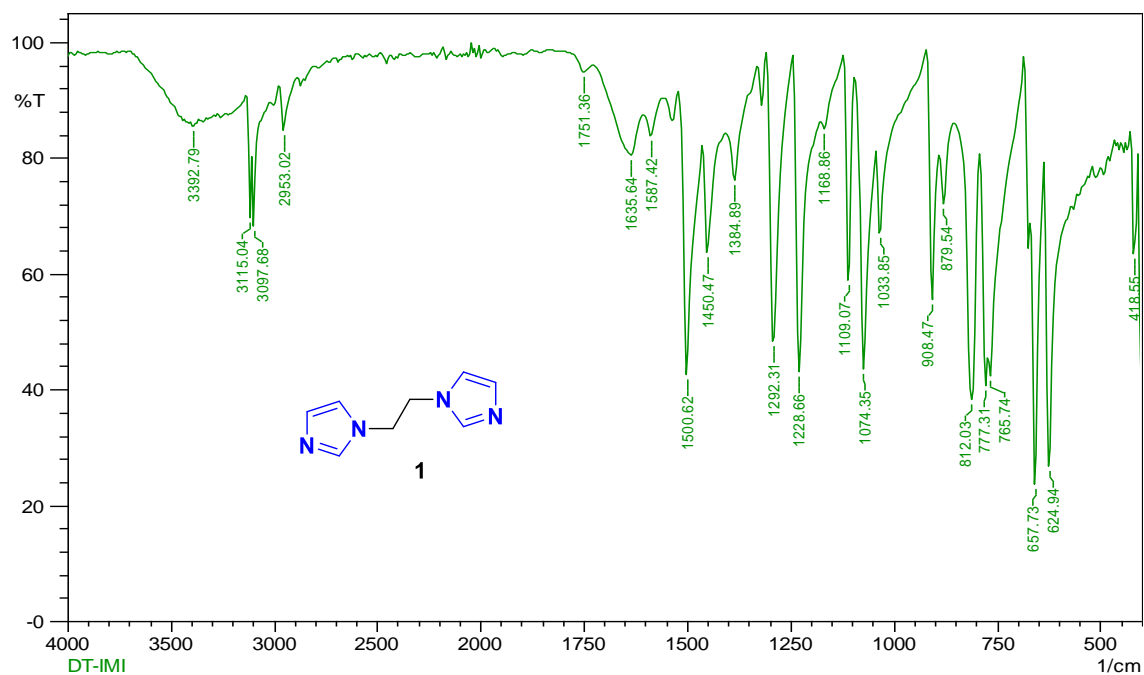

**Figure S3.** IR spectra of compound **1**

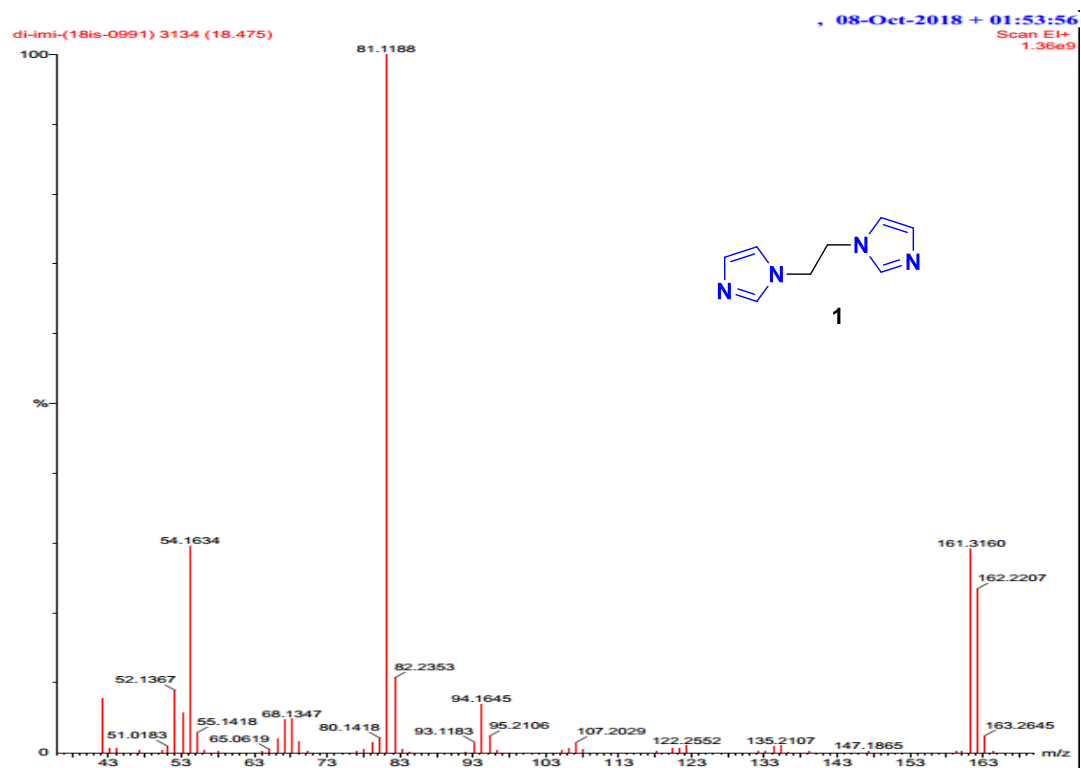

**Figure S4.** GCMS spectra of compound **1**.

Signature SIF VIT VELLORE  
BI-IL-OH

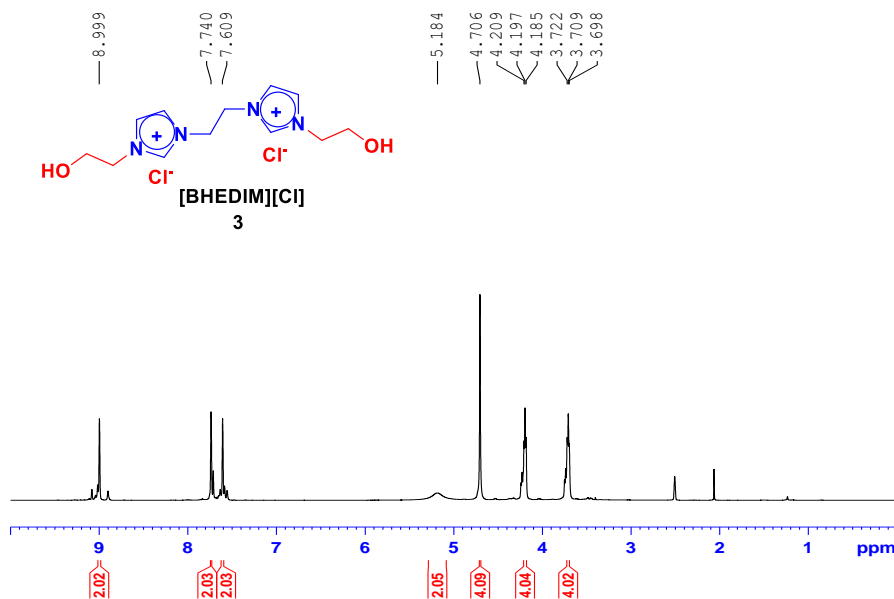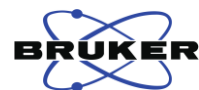

Current Data Parameters  
NAME BI-IL-OH  
EXPNO 5  
PROCNO 1

F2 - Acquisition Parameters  
Date\_ 20200130  
Time 18.25 h  
INSTRUM spect  
PROBHD Z108618\_0505 (zg30)  
PULPROG 65536  
TD 16  
SOLVENT DMSO  
NS 2  
DS 8012.820 Hz  
SWH 0.244532 Hz  
FIDRES 4.0894465 sec  
RG 35.49  
DW 62.400 usec  
DE 6.50 usec  
TE 297.3 K  
D1 1.00000000 sec  
TD0 1  
SF01 400.2604716 MHz  
NUC1 1H  
P1 14.00 usec  
PLW1 16.00000000 W

F2 - Processing parameters  
SI 65536  
SF 400.2580000 MHz  
WDW EM  
SSB 0  
LB 0.30 Hz  
GB 0  
PC 1.00

Figure S5.  $^1\text{H}$ NMR (400MHz) compound 3 in DMSO- $\text{d}_6$

Signature SIF VIT VELLORE  
BI-IL-OH

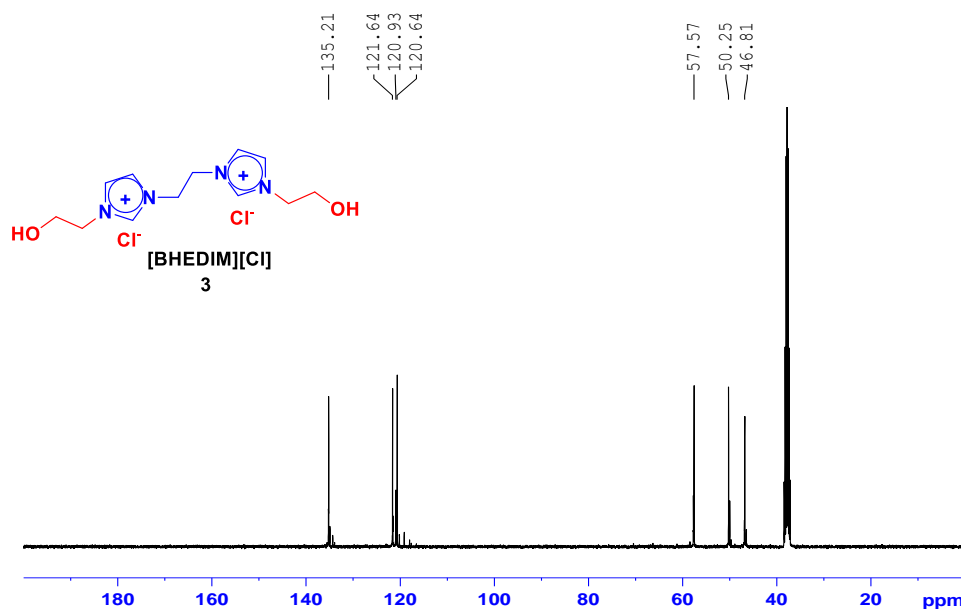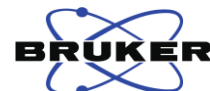

Current Data Parameters  
NAME BI-IL-OH  
EXPNO 6  
PROCNO 1

F2 - Acquisition Parameters  
Date\_ 20200130  
Time 18.56 h  
INSTRUM spect  
PROBHD Z108618\_0505 (zgpg30)  
PULPROG 65536  
TD 512  
SOLVENT DMSO  
NS 4  
DS 24038.461 Hz  
SWH 0.733596 Hz  
FIDRES 1.3631488 sec  
RG 199.6  
DW 20.800 usec  
DE 6.50 usec  
TE 297.6 K  
D1 2.00000000 sec  
D11 0.03000000 sec  
TD0 1  
SF01 100.6550186 MHz  
NUC1 13C  
P1 9.80 usec  
PLW1 58.00000000 W  
SF02 400.2596010 MHz  
NUC2 1H  
PCPDPRG[2] waltz16  
PCPD2 90.00 usec  
PLW2 16.00000000 W  
PLW12 0.38716000 W  
PLW13 0.19474000 W

F2 - Processing parameters  
SI 32768  
SF 100.6451587 MHz  
WDW EM  
SSB 0  
LB 1.00 Hz  
GB 0  
PC 1.40

Figure S6.  $^{13}\text{C}$  NMR (400MHz) compound 3 in DMSO- $\text{d}_6$

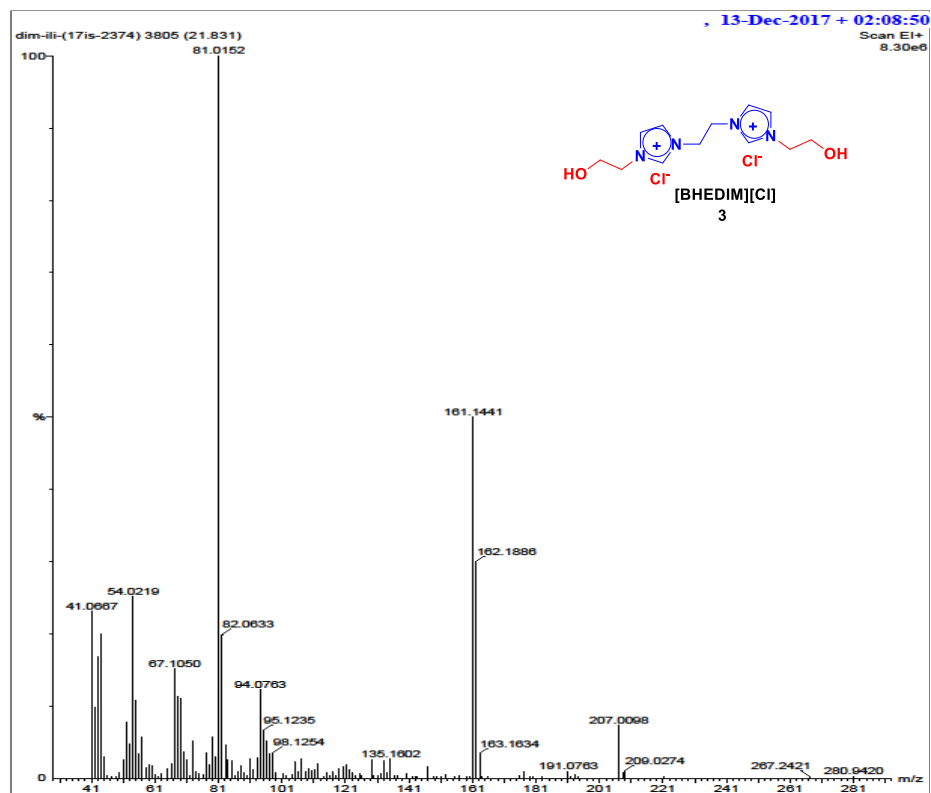

**Figure S7.** GCMS Spectrum of compound **3**



Signature SIF VIT VELLORE  
ALCO

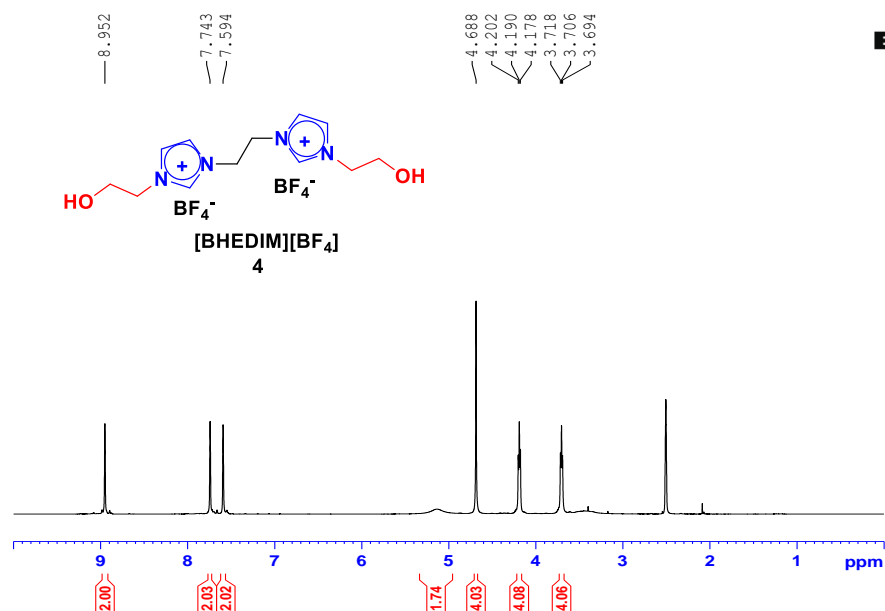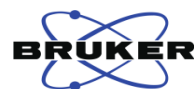

Current Data Parameters  
NAME ALCO  
EXPNO 31  
PROCNO 1

F2 - Acquisition Parameters  
Date\_ 20181114  
Time\_ 21.28 h  
INSTRUM spect  
PROBHD Z108618\_0505 (   
PULPROG zg30  
TD 65536  
SOLVENT DMSO  
NS 16  
DS 2  
SWH 8012.820 Hz  
FIDRES 0.244522 Hz  
AQ 4.0894465 sec  
RG 98.85  
DW 62.400 usec  
DE 6.50 usec  
TE 297.8 K  
D1 1.00000000 sec  
TD0 1  
SFO1 400.2604716 MHz  
NUC1 1H  
P1 14.00 usec  
PLW1 16.00000000 W

F2 - Processing parameters  
SI 65536  
SF 400.2580000 MHz  
WDW EM  
SSB 0  
LB 0.30 Hz  
GB 0  
PC 1.00

Figure S8. <sup>1</sup>H NMR (400MHz) compound **4** in DMSO-d<sub>6</sub>

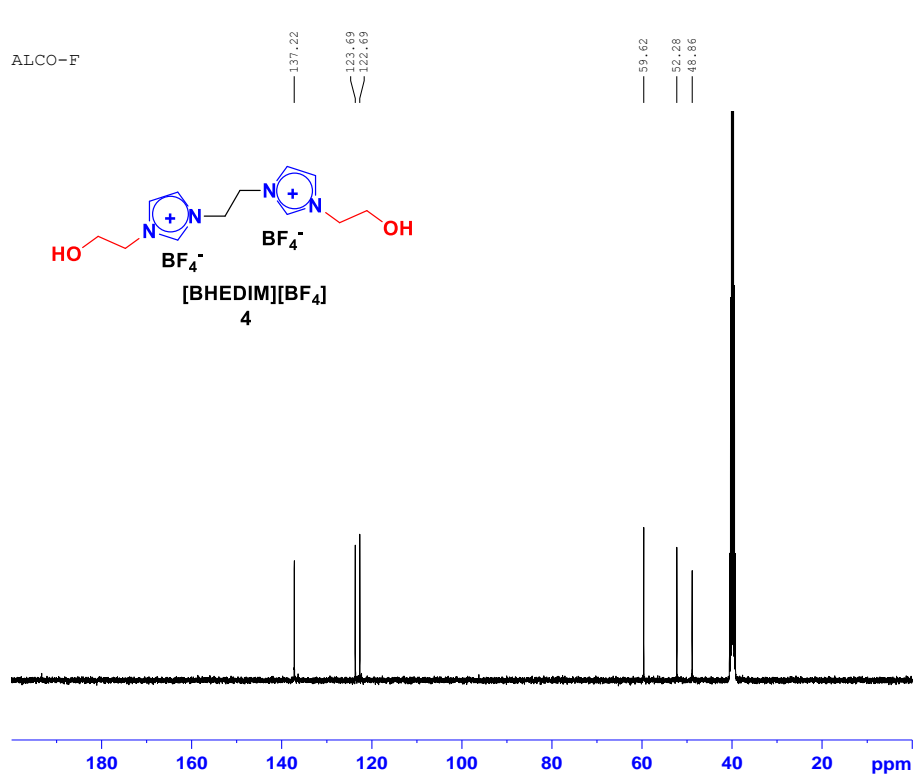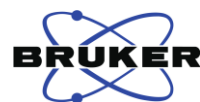

Current Data Parameters  
NAME Dr.BM141118  
EXPNO 32  
PROCNO 1

F2 - Acquisition Parameters  
Date\_ 20181114  
Time\_ 21.58 h  
INSTRUM spect  
PROBHD Z108618\_0505 (   
PULPROG zgpg30  
TD 65536  
SOLVENT DMSO  
NS 512  
DS 4  
SWH 24038.461 Hz  
FIDRES 0.733596 Hz  
AQ 1.3631488 sec  
RG 199.6  
DW 20.800 usec  
DE 6.50 usec  
TE 298.3 K  
D1 2.00000000 sec  
D11 0.03000000 sec  
TD0 1  
SFO1 100.6550186 MHz  
NUC1 13C  
P1 9.80 usec  
PLW1 58.00000000 W  
SFO2 400.2596010 MHz  
NUC2 1H  
CPDPRG[2] waltz16  
PCPD2 90.00 usec  
PLW2 16.00000000 W  
PLW12 0.38716000 W  
PLW13 0.19474000 W

F2 - Processing parameters  
SI 32768  
SF 100.6449542 MHz  
WDW EM  
SSB 0  
LB 1.00 Hz  
GB 0  
PC 1.40

Figure S9. <sup>13</sup>C NMR (400MHz) compound **4** in DMSO-d<sub>6</sub>

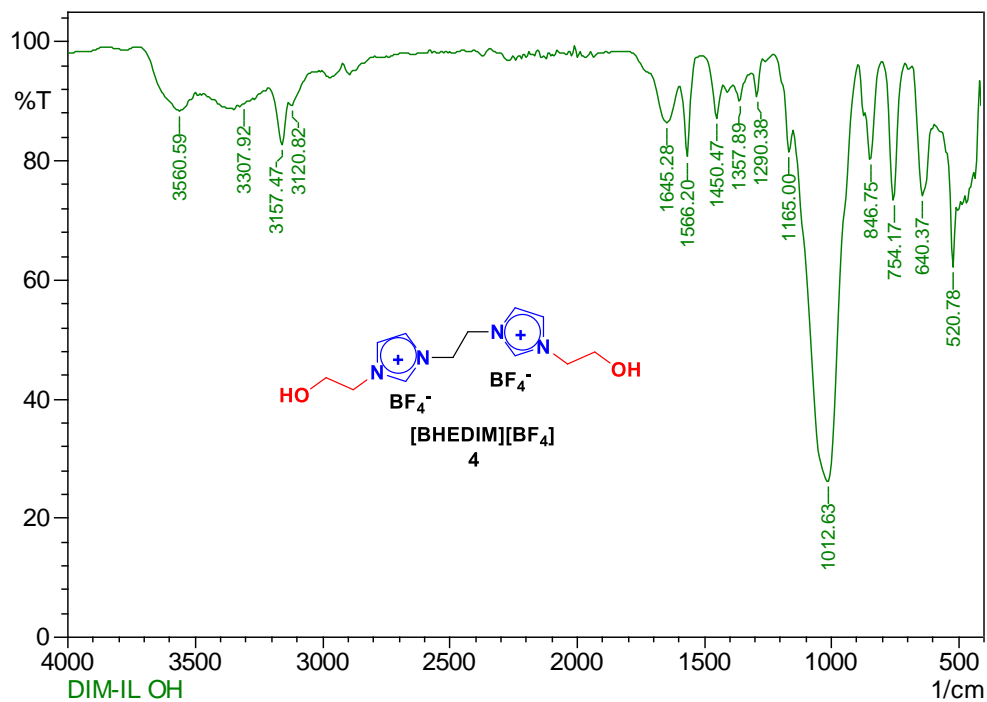

Figure S10. IR spectra of compound 4

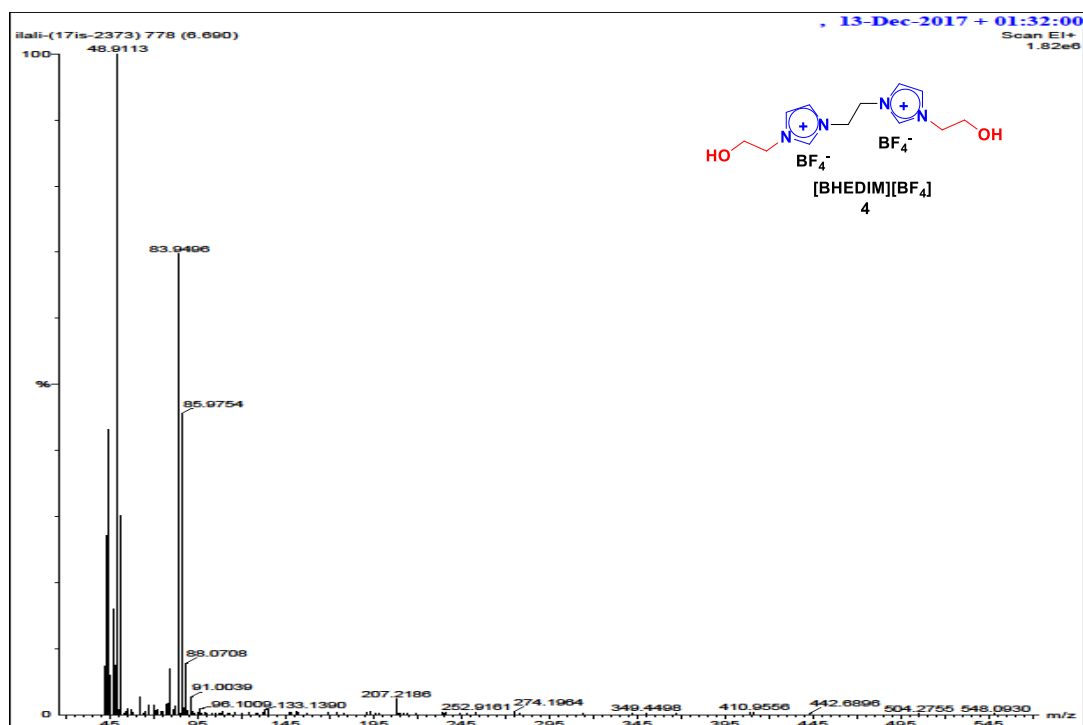

Figure S11. GCMS Spectrum of compound 4

Signature SIF VIT VELLORE  
BI-IL-PC

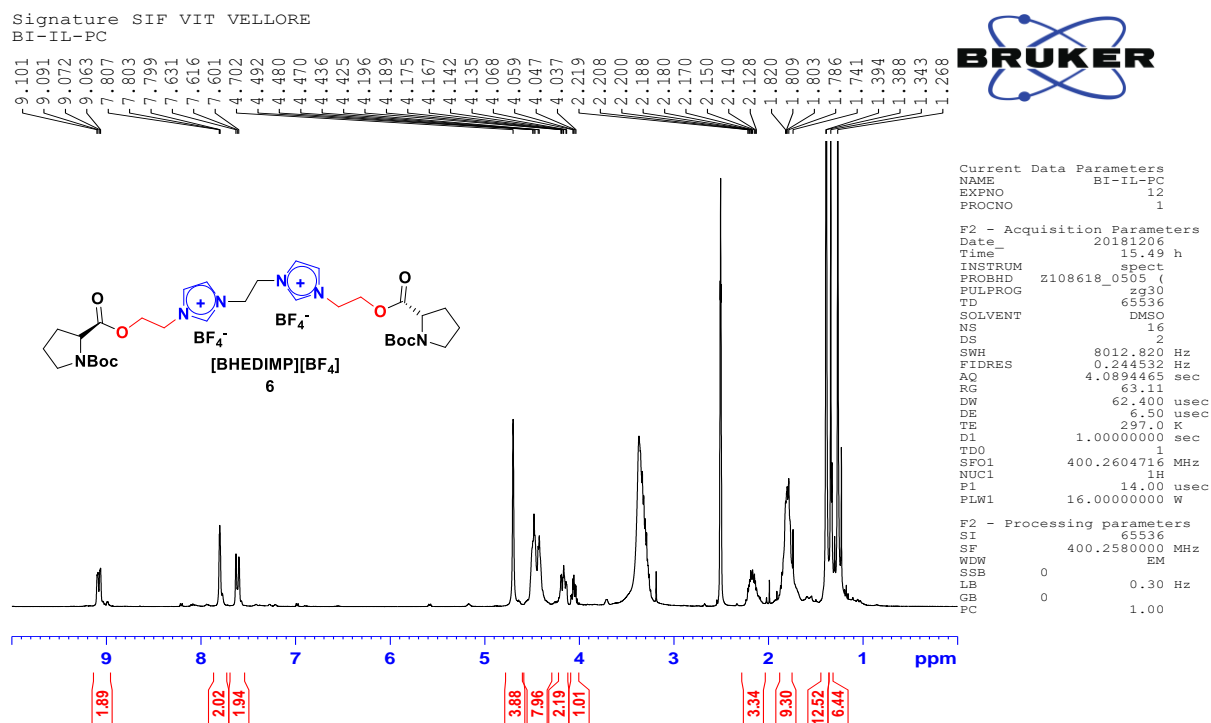

Figure S12. <sup>1</sup>H NMR (400MHz) compound 6 in DMSO-d<sub>6</sub>

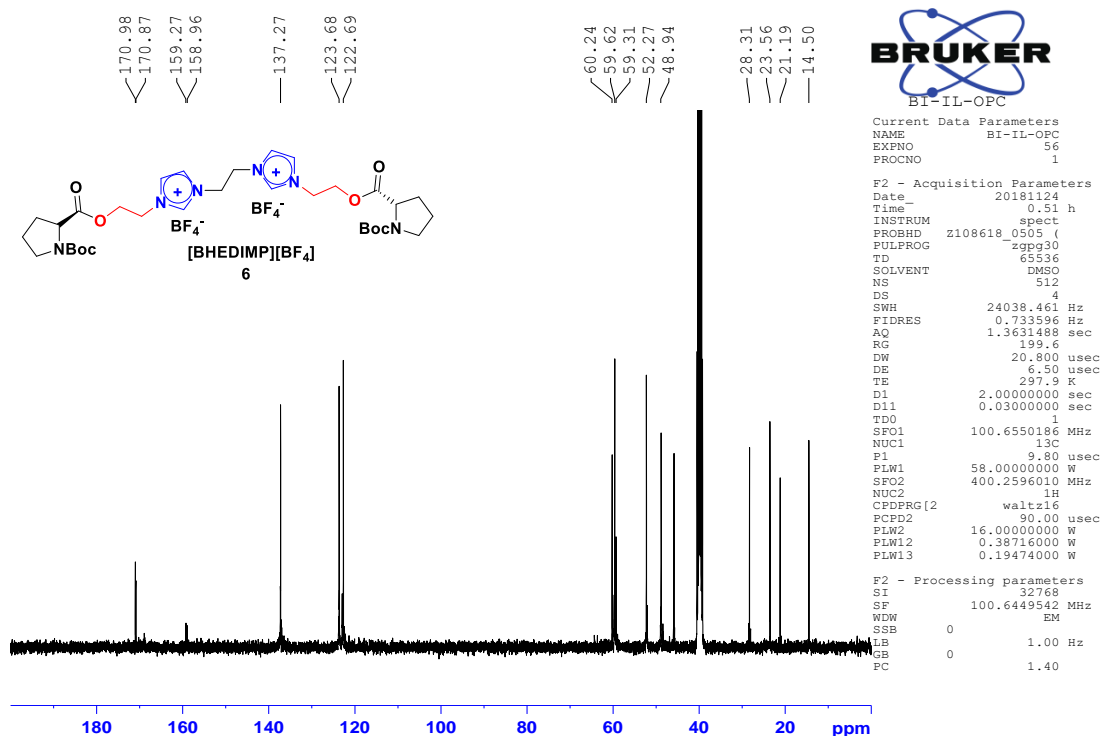

Figure S13. <sup>13</sup>C NMR (400MHz) compound 6 in DMSO-d<sub>6</sub>

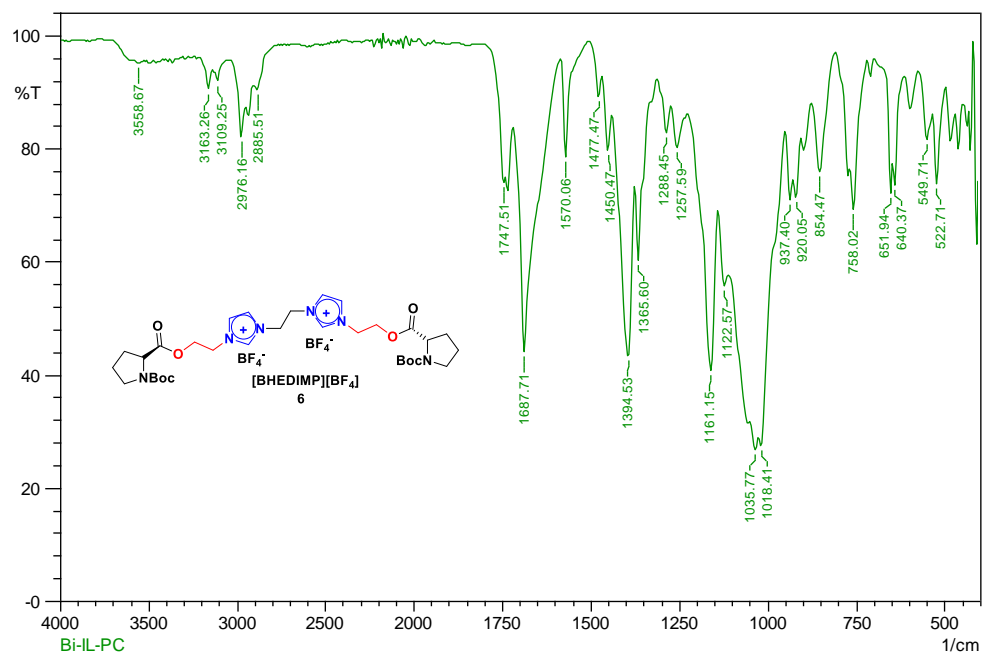

**Figure S14.** IR Spectrum of compound **6**

Signature SIF VIT VELLORE  
BP-OH-IL-F

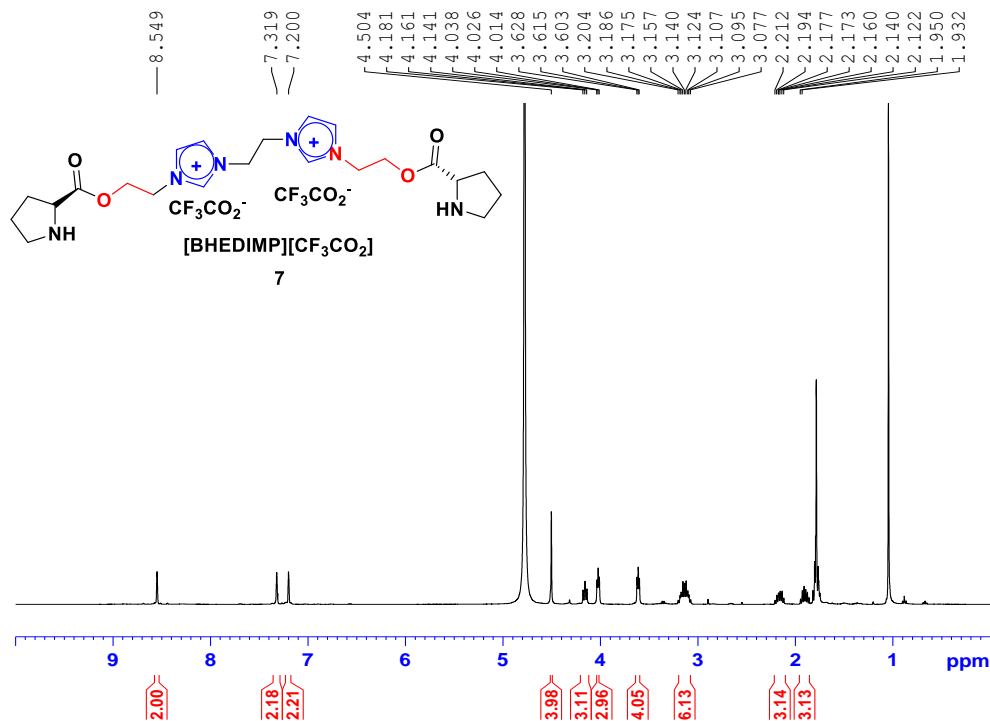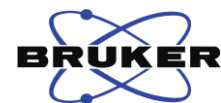

Current Data Parameters  
NAME BI-OH-IL-F  
EXPNO 7  
PROCNO 1

F2 - Acquisition Parameters  
Date\_ 20190607  
Time 7.53 h  
INSTRUM spect  
PROBHD Z108618\_0505 ( )  
PULPROG zg30  
TD 65536  
SOLVENT D2O  
NS 16  
DS 2  
SWH 8012.820 Hz  
FIDRES 0.244532 Hz  
AQ 4.0894465 sec  
RG 35.49  
DW 62.400 usec  
DE 6.50 usec  
TE 298.6 K  
D1 1.00000000 sec  
TD0 1  
SFO1 400.2604716 MHz  
NUC1 1H  
P1 14.00 usec  
PLW1 16.00000000 W

F2 - Processing parameters  
SI 65536  
SF 400.2580000 MHz  
WDW EM  
SSB 0  
LB 0.30 Hz  
GB 0  
PC 1.00

Figure S15. <sup>1</sup>H NMR (400MHz) compound **7** in D<sub>2</sub>O

Signature SIF VIT VELLORE  
BP-OH-IL-F

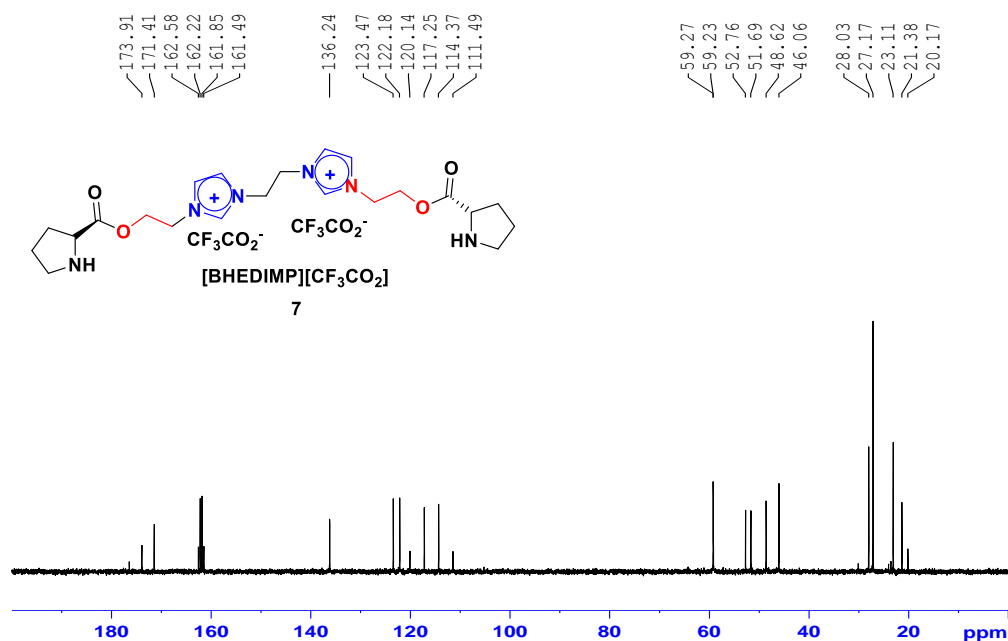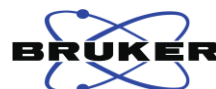

Current Data Parameters  
NAME BI-OH-IL-F  
EXPNO 8  
PROCNO 1

F2 - Acquisition Parameters  
Date\_ 20190607  
Time 8.25 h  
INSTRUM spect  
PROBHD Z108618\_0505 ( )  
PULPROG zgpg30  
TD 65536  
SOLVENT D2O  
NS 512  
DS 4  
SWH 24038.461 Hz  
FIDRES 0.733596 Hz  
AQ 1.3631488 sec  
RG 199.6  
DW 20.800 usec  
DE 6.50 usec  
TE 299.2 K  
D1 2.00000000 sec  
D11 0.03000000 sec  
TD0 1  
SFO1 100.6550186 MHz  
NUC1 13C  
P1 9.80 usec  
PLW1 58.00000000 W  
SFO2 400.2596010 MHz  
NUC2 1H  
CPDPRG[2] waltz16  
PCPD2 90.00 usec  
PLW2 16.00000000 W  
PLW12 0.38716000 W  
PLW13 0.19474000 W

F2 - Processing parameters  
SI 32768  
SF 100.6449542 MHz  
WDW EM  
SSB 0  
LB 1.00 Hz  
GB 0  
PC 1.40

Figure S16. <sup>13</sup>C NMR (400MHz) compound **7** in D<sub>2</sub>O

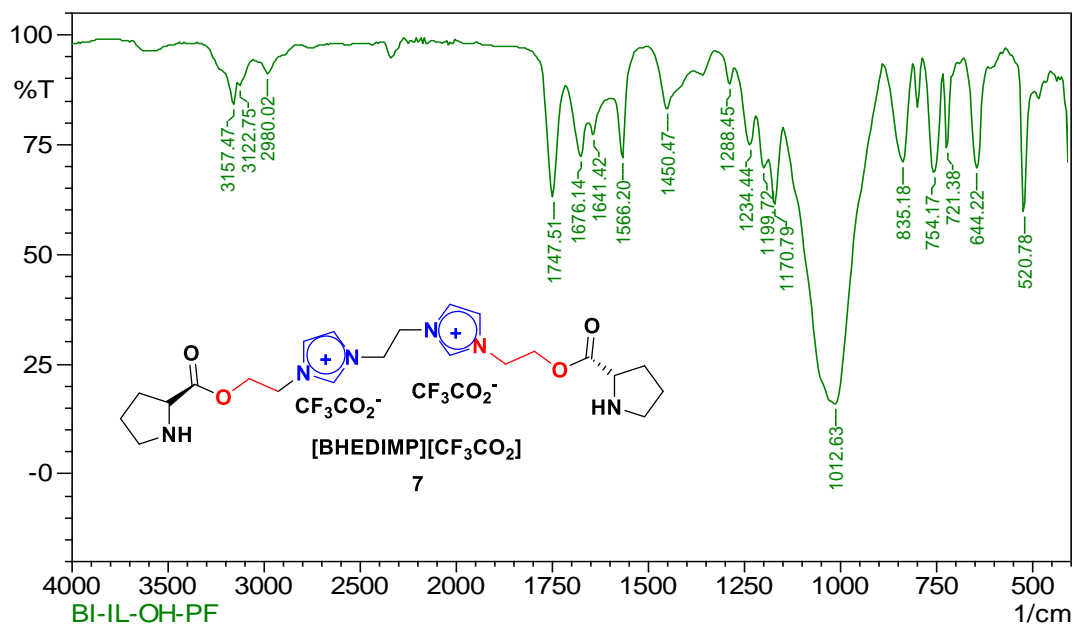

**Figure S17.** IR spectra of compound 7.

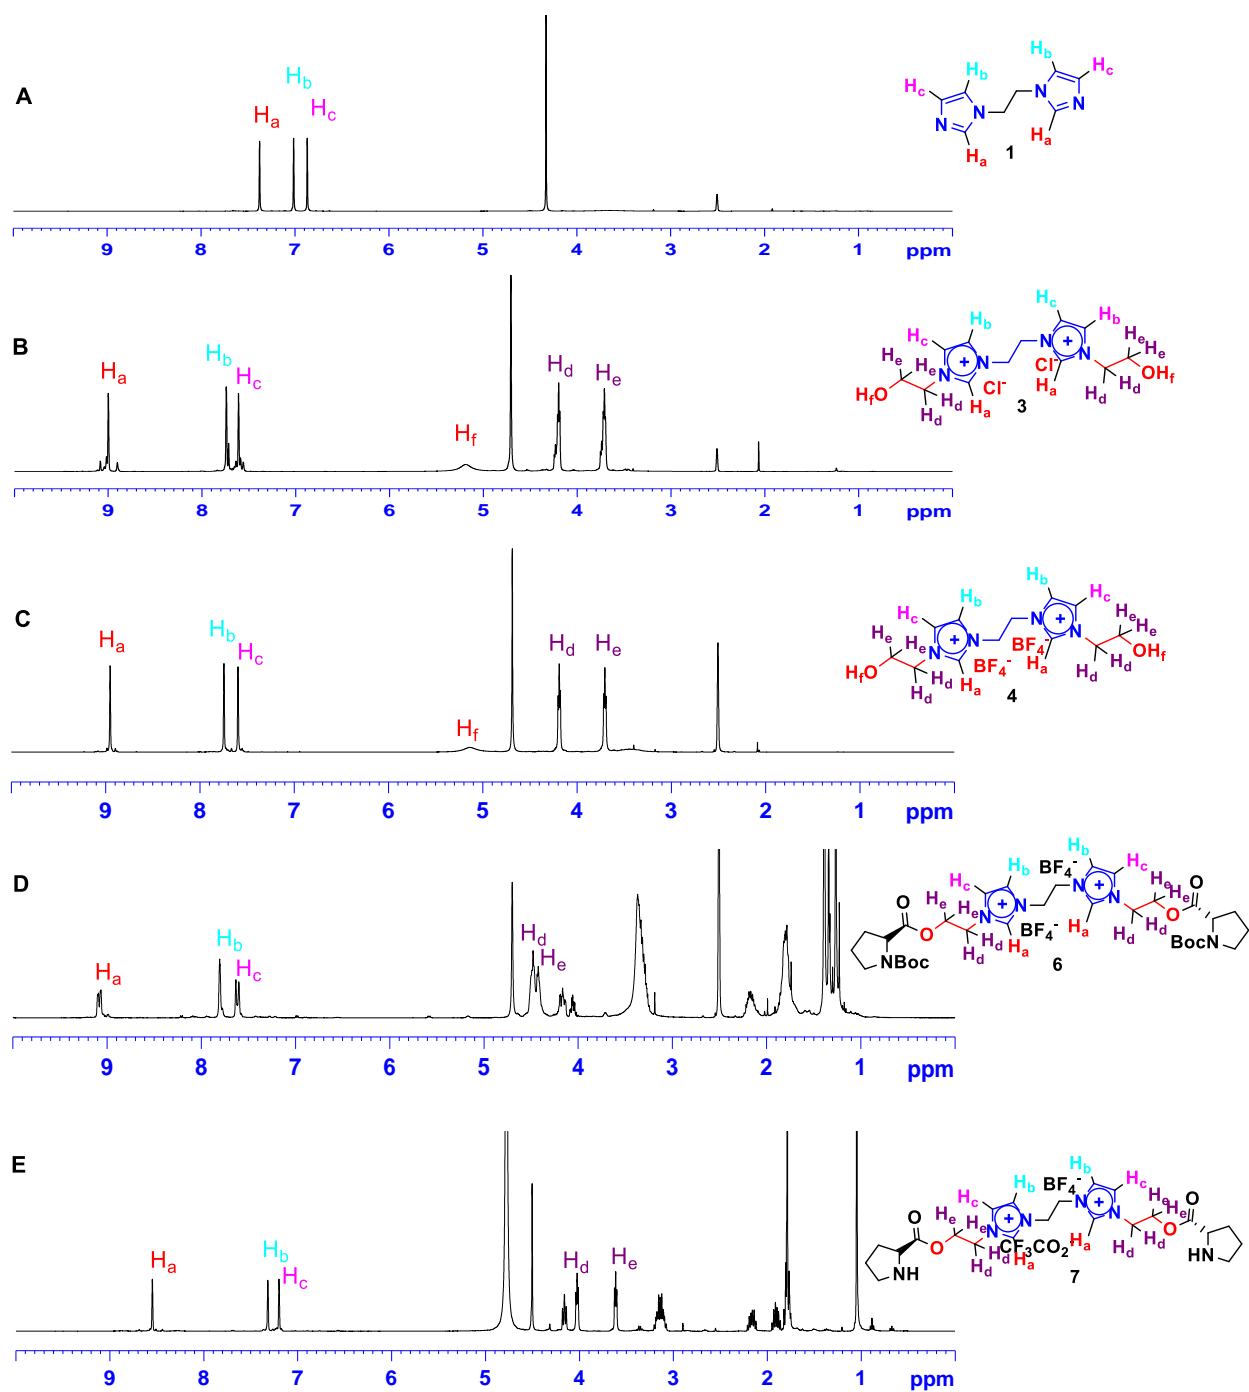

**Figure S18.** Stepwise  $^1\text{H}$  NMR spectrum for (*S*)-proline organocatalyst  $[\text{BHEDIMP}][\text{CF}_3\text{CO}_2]$  **7**.

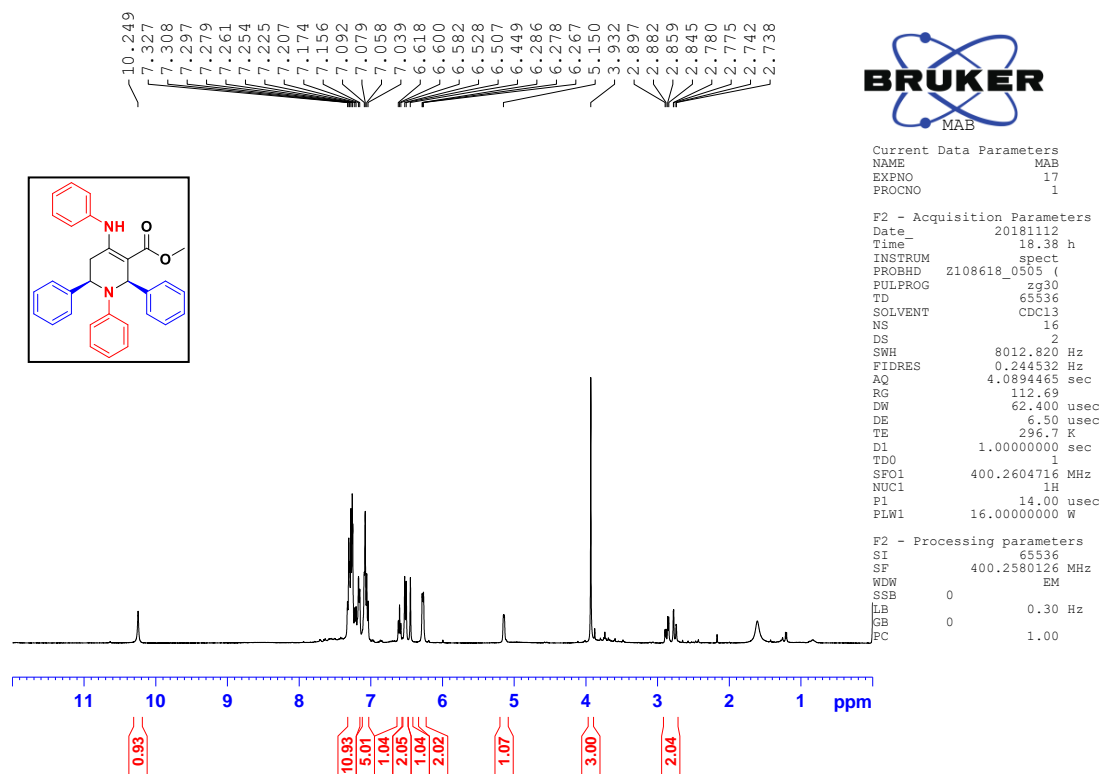

**Figure S19.** <sup>1</sup>H NMR (400 MHz) of compound **11a** in CDCl<sub>3</sub>

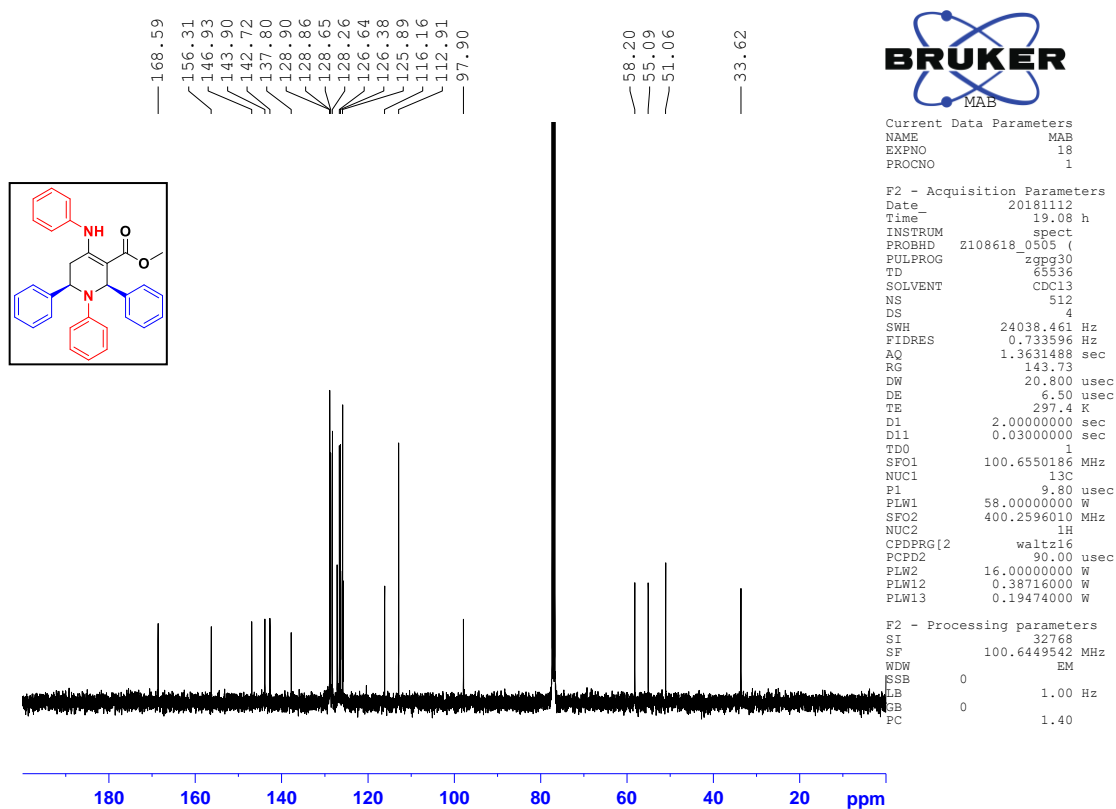

**Figure S20.** <sup>13</sup>C NMR Spectrum (100 MHz) of compound **11a** in CDCl<sub>3</sub>



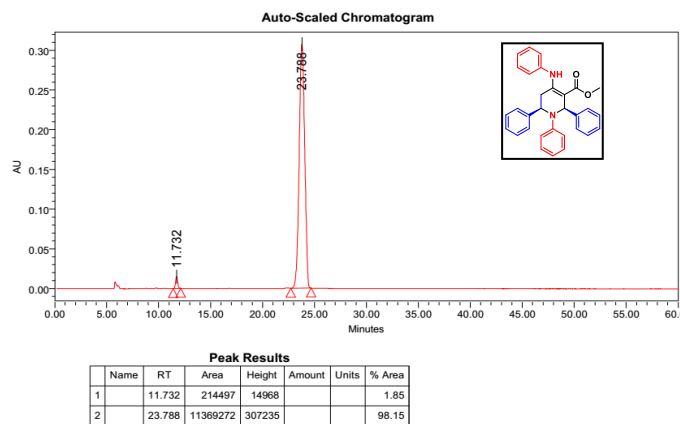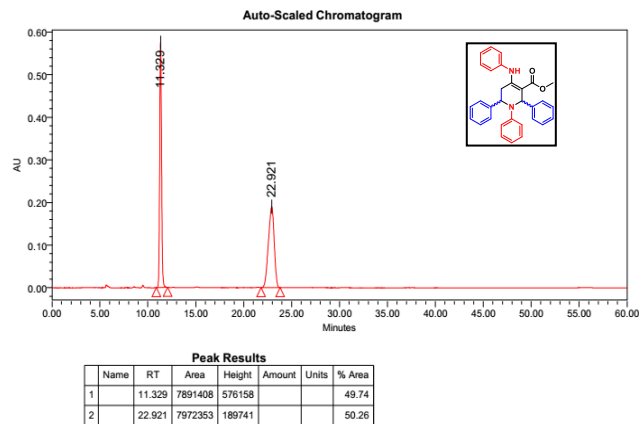

**Figure S21.** HPLC Chromatogram of compound **11a**

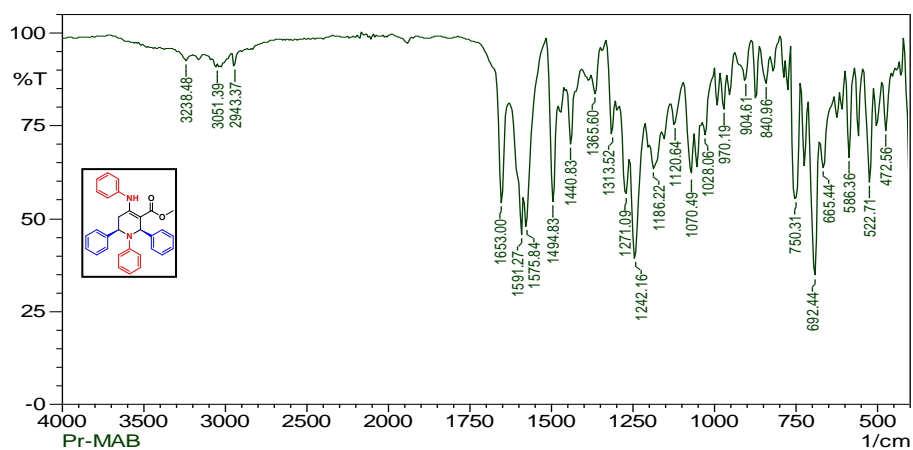

**Figure S22.** IR Spectrum of compound **11a**

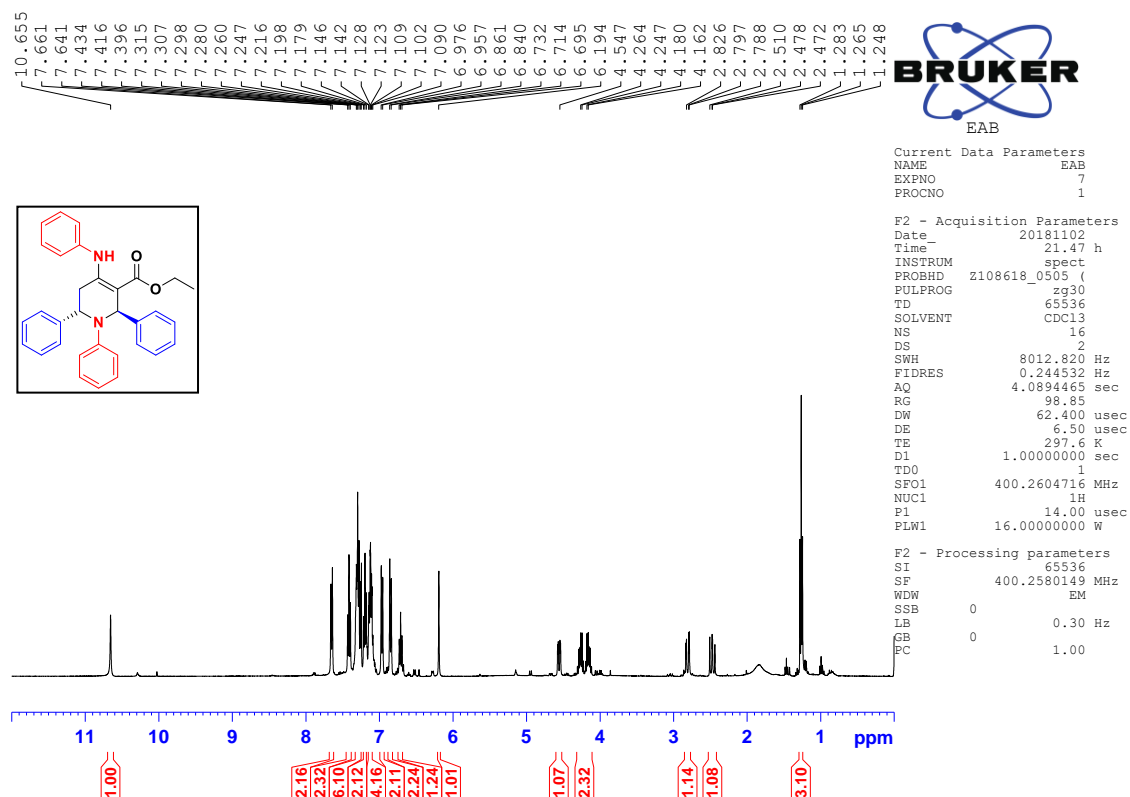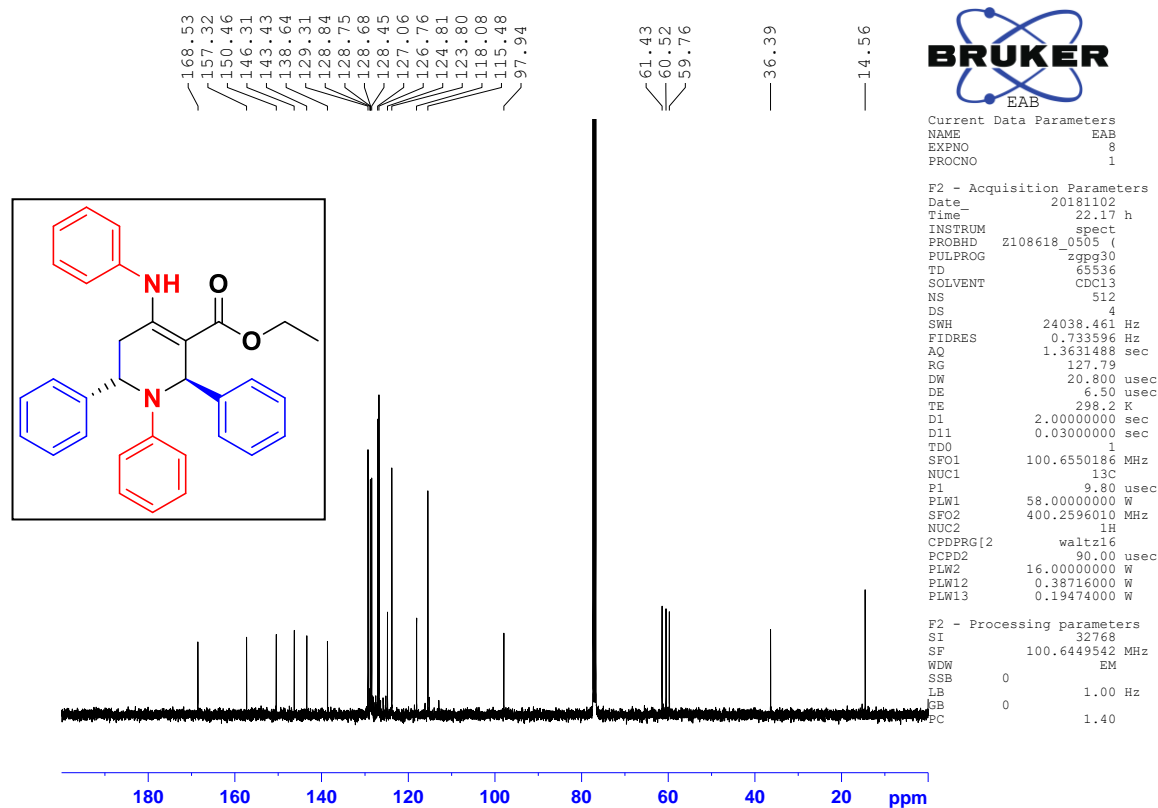

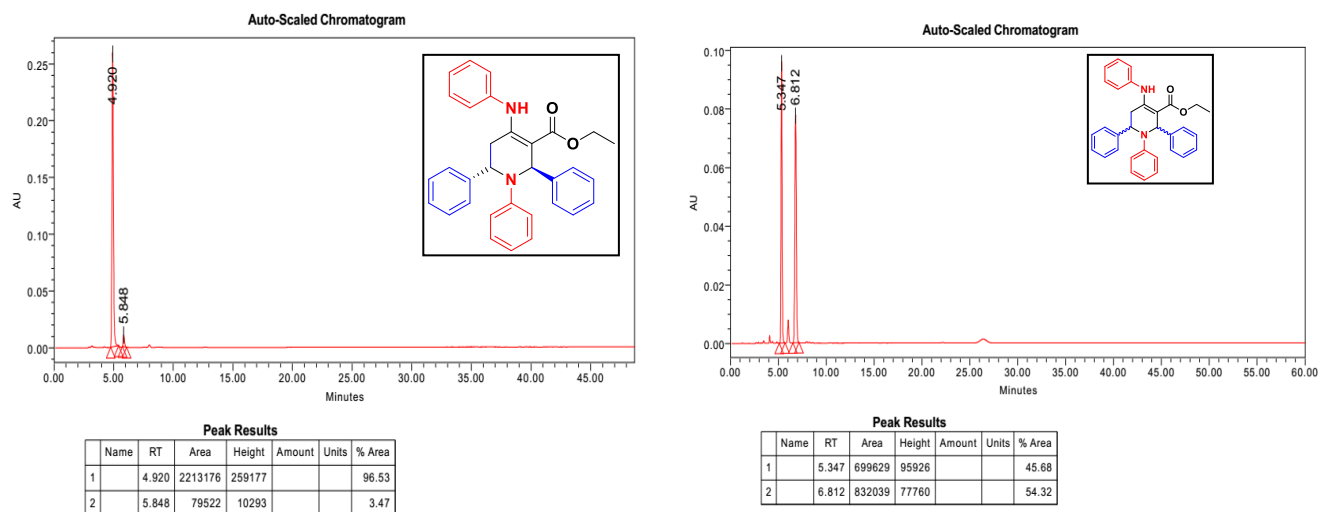

**Figure S25.** HPLC Chromatogram of compound **11b**

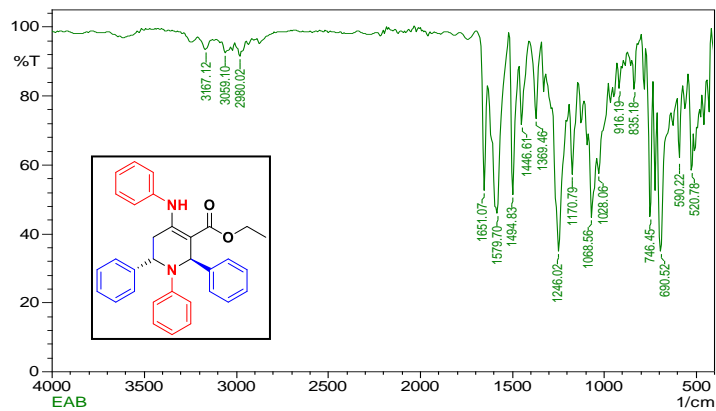

**Figure S26.** IR Spectrum of compound **11b**

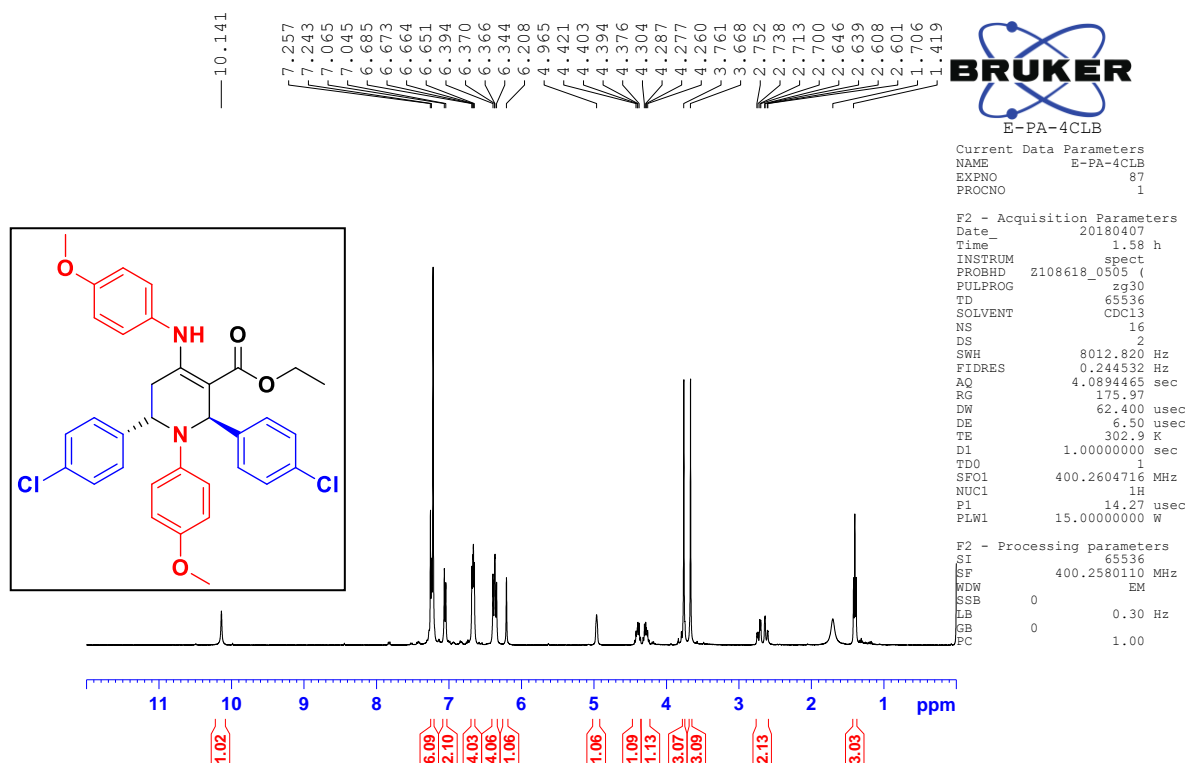

Figure S27. <sup>1</sup>H NMR (400 MHz) of compound 11c in CDCl<sub>3</sub>

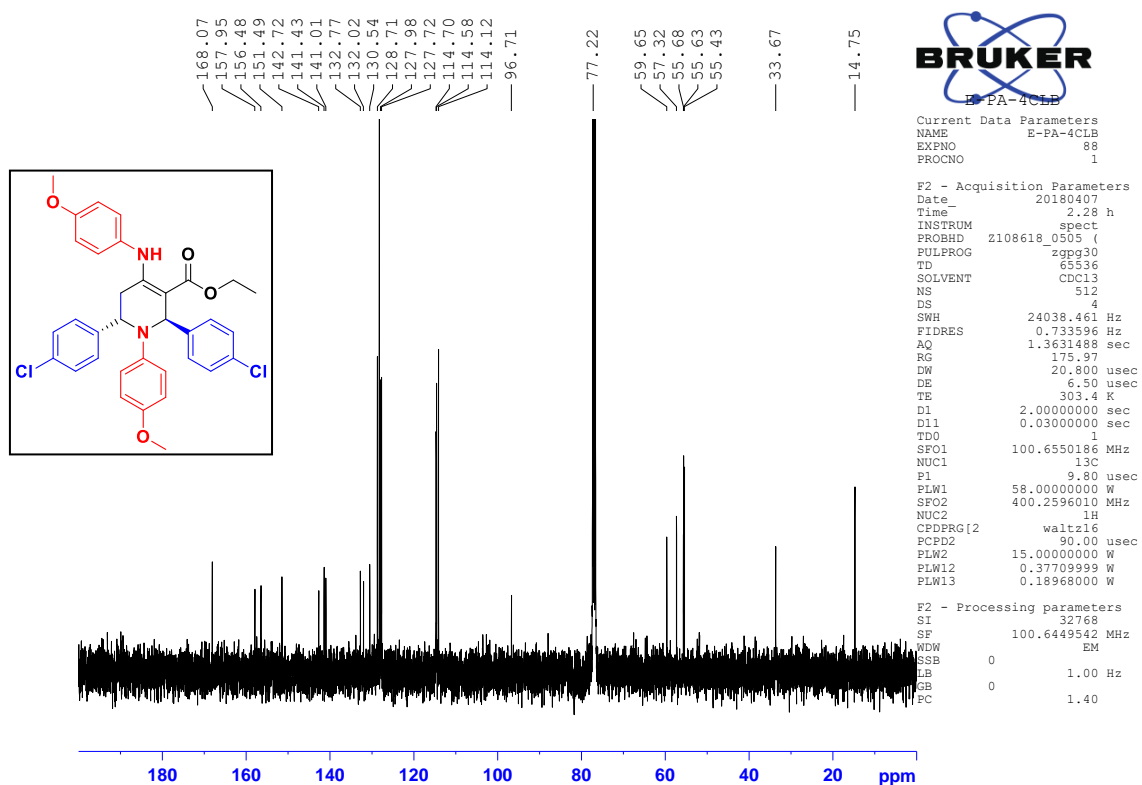

Figure S28. <sup>13</sup>C NMR Spectrum (100 MHz) of compound 11c in CDCl<sub>3</sub>

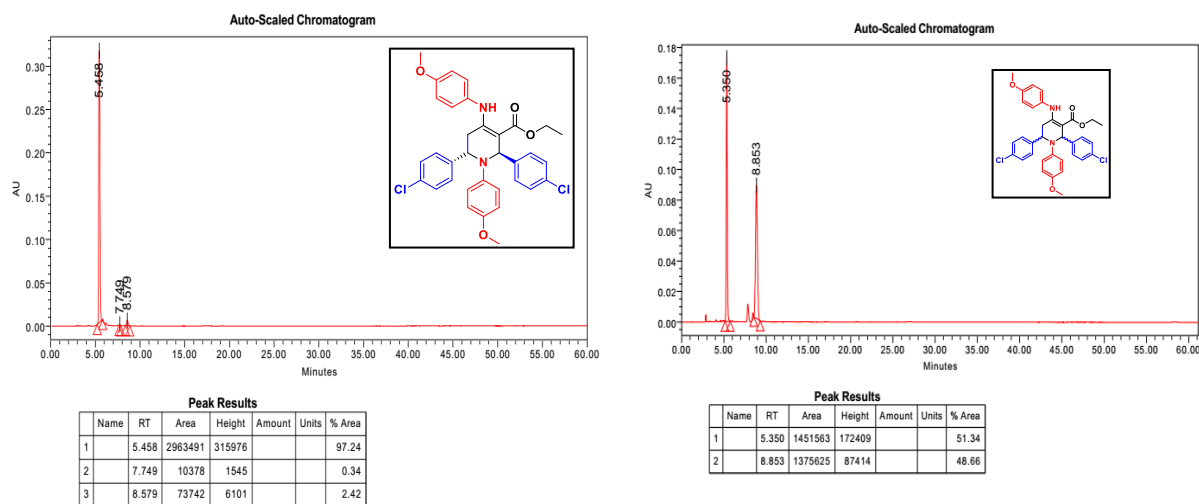

**Figure S29.** HPLC Chromatogram of compound **11c**

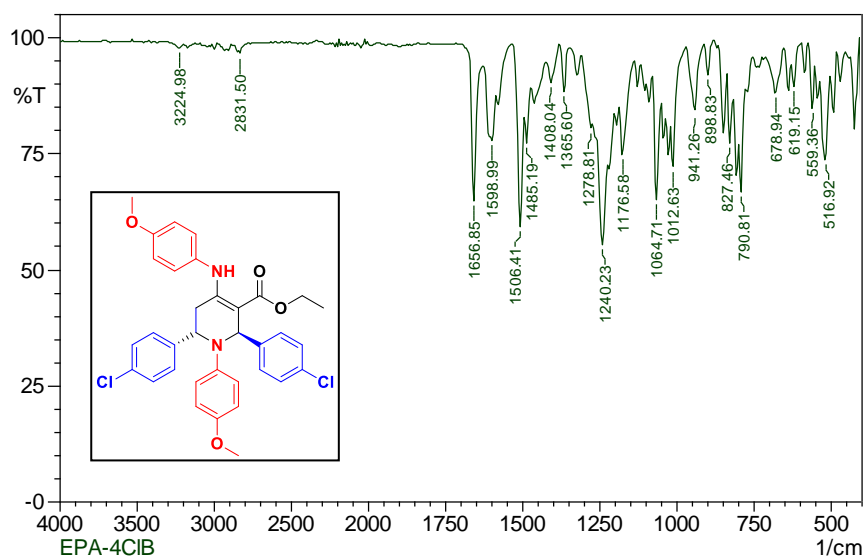

**Figure S30.** IR Spectrum of compound **11c**

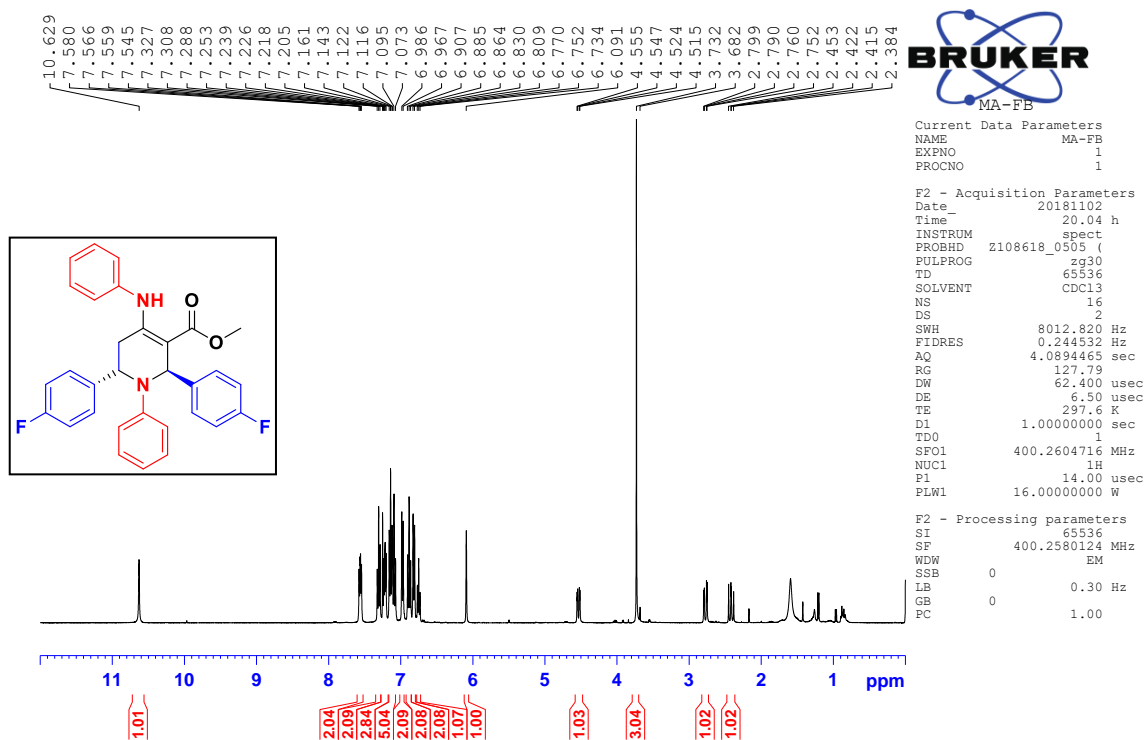

**Figure S31.**  $^1\text{H}$  NMR (400 MHz) of compound **11d** in  $\text{CDCl}_3$

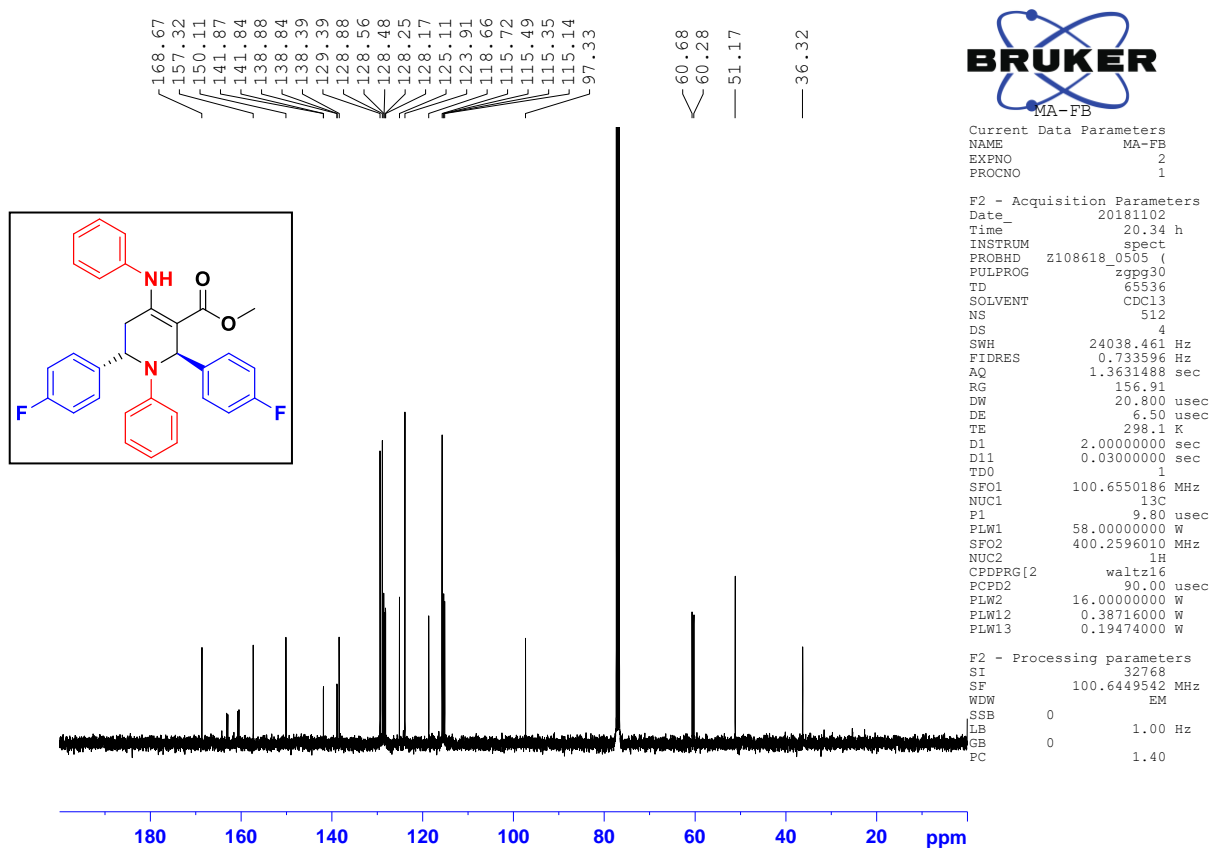

**Figure S32.**  $^{13}\text{C}$  NMR Spectrum (100 MHz) of compound **11d** in  $\text{CDCl}_3$

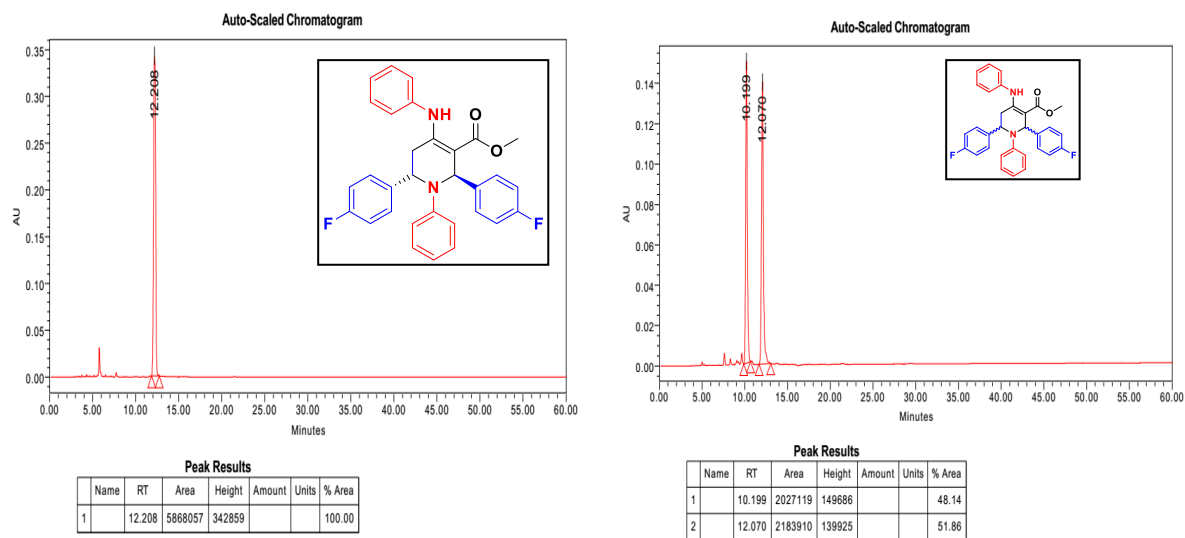

**Figure S33.** HPLC Chromatogram of compound **11d**

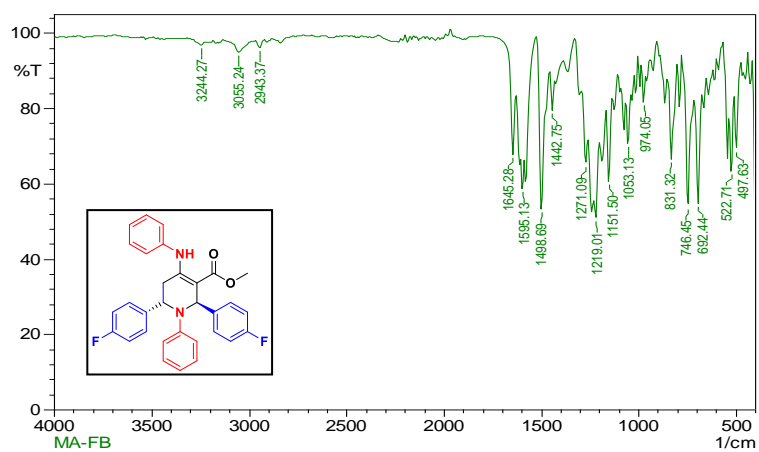

**Figure S34.** IR Spectrum of compound **11d**

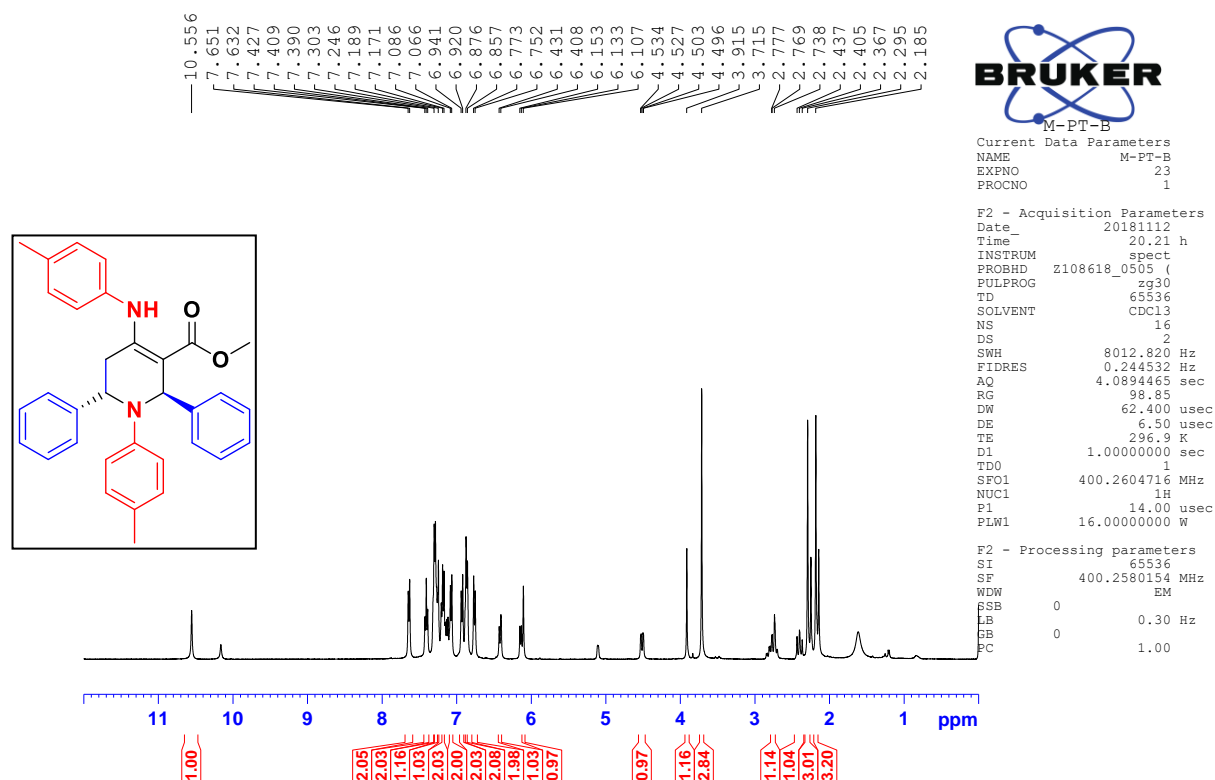

**Figure S35.** <sup>1</sup>H NMR (400 MHz) of compound **11e** in CDCl<sub>3</sub>

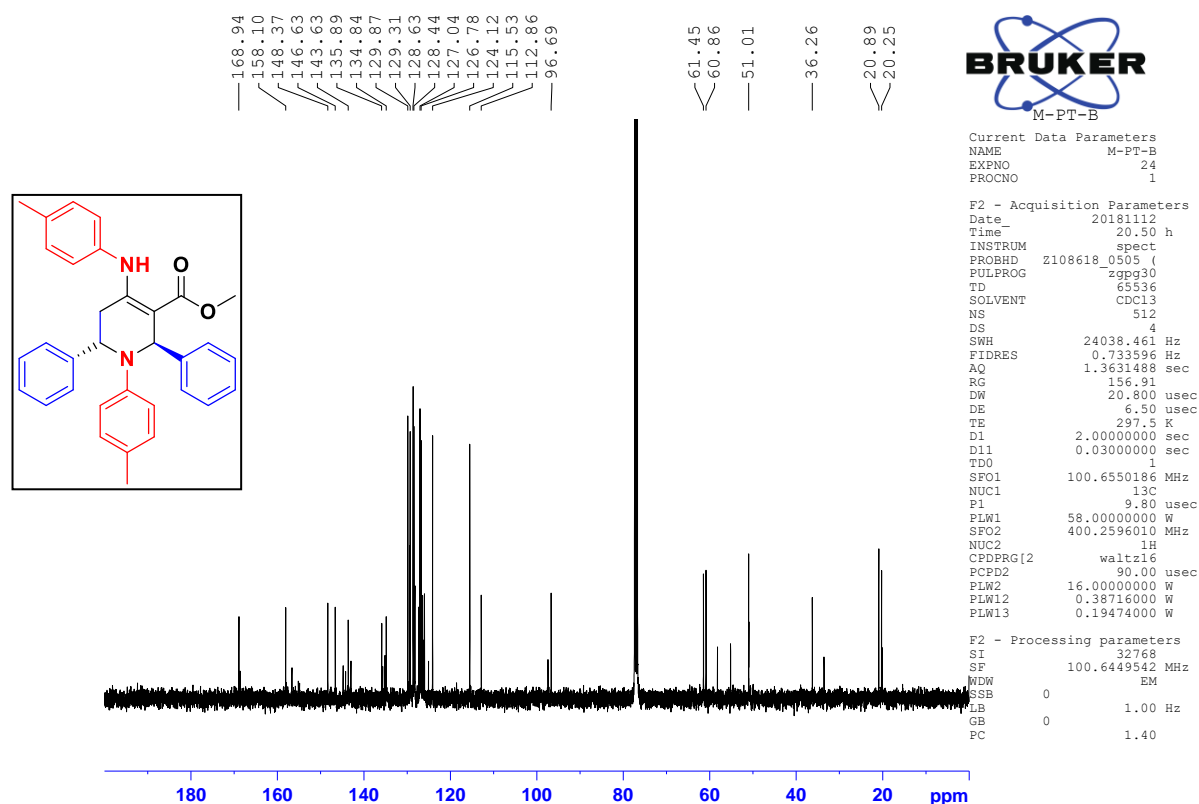

**Figure S36:** <sup>13</sup>C NMR Spectrum (100 MHz) of compound **11e** in CDCl<sub>3</sub>



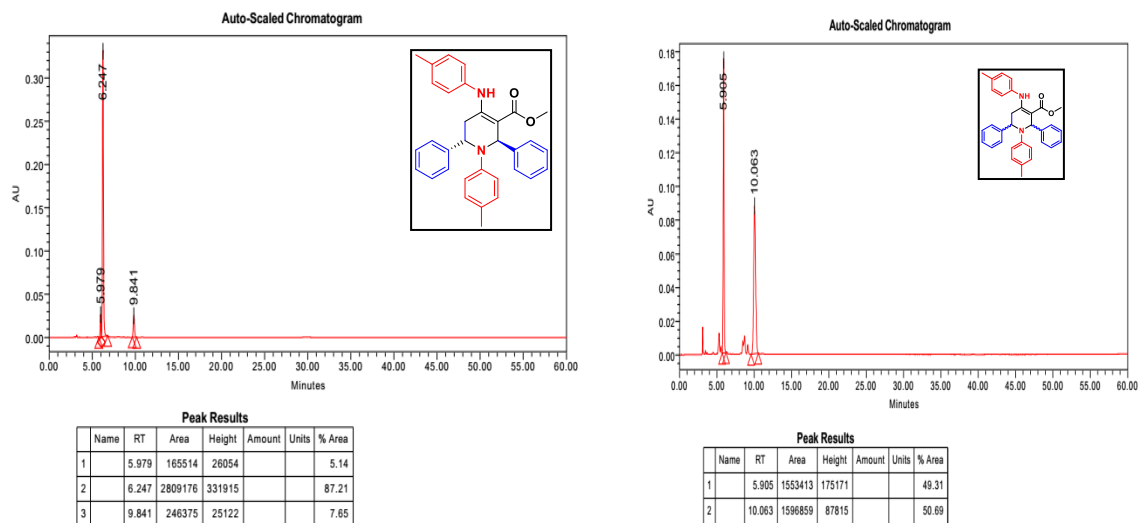

**Figure S37.** HPLC Chromatogram of compound **11e**

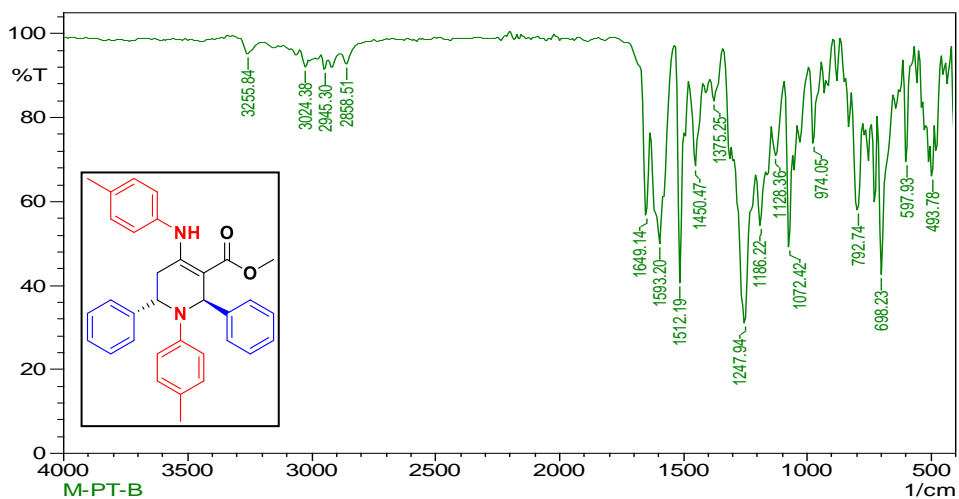

**Figure S38.** IR Spectrum of compound **11e**

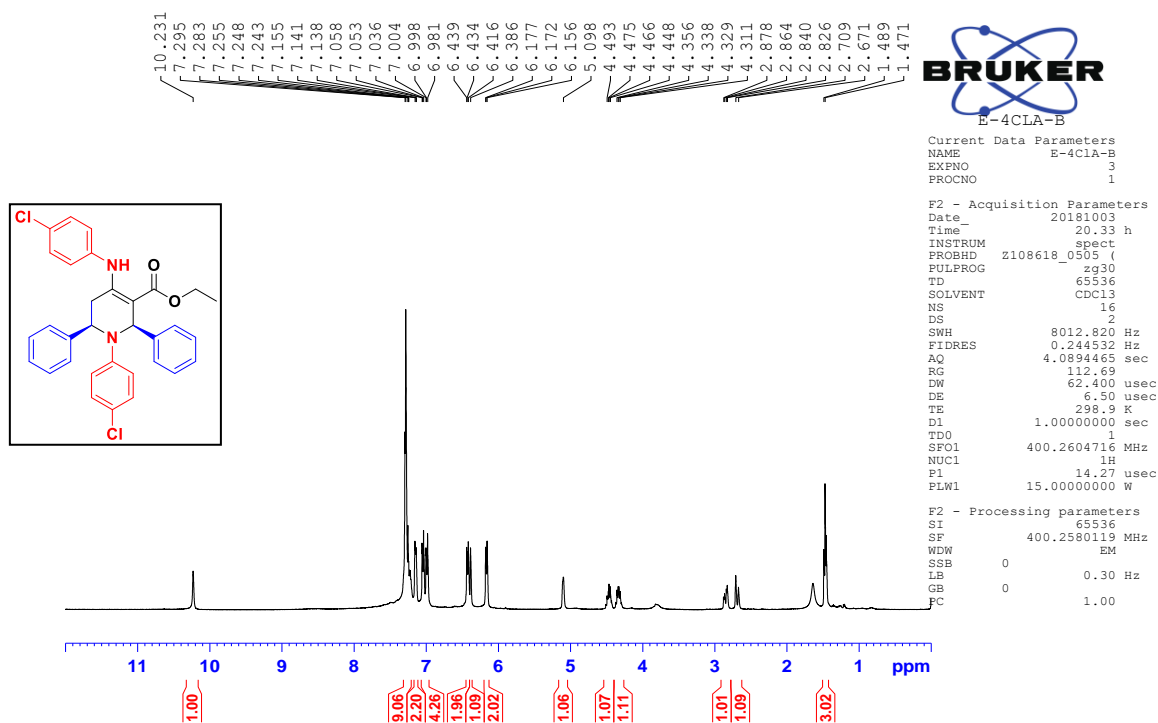

**Figure S39.**  $^1\text{H}$  NMR (400 MHz) of compound **11f** in  $\text{CDCl}_3$

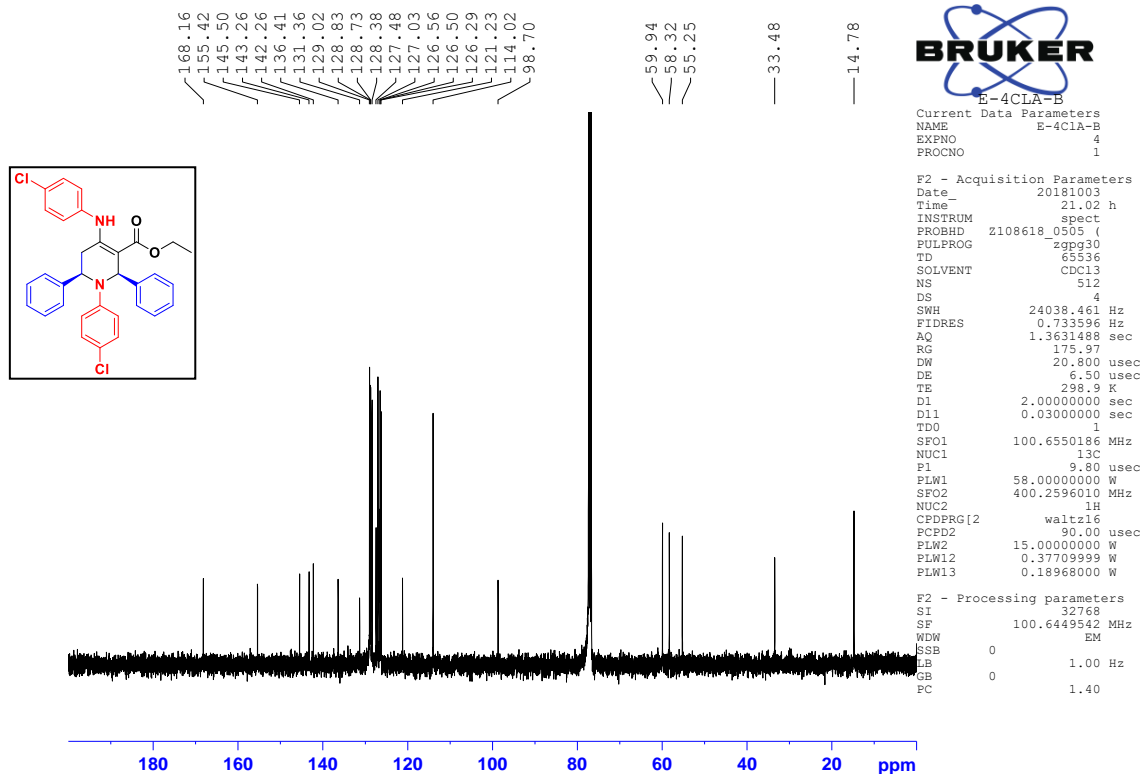

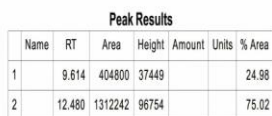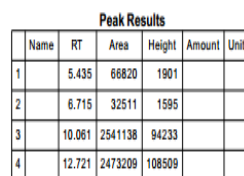

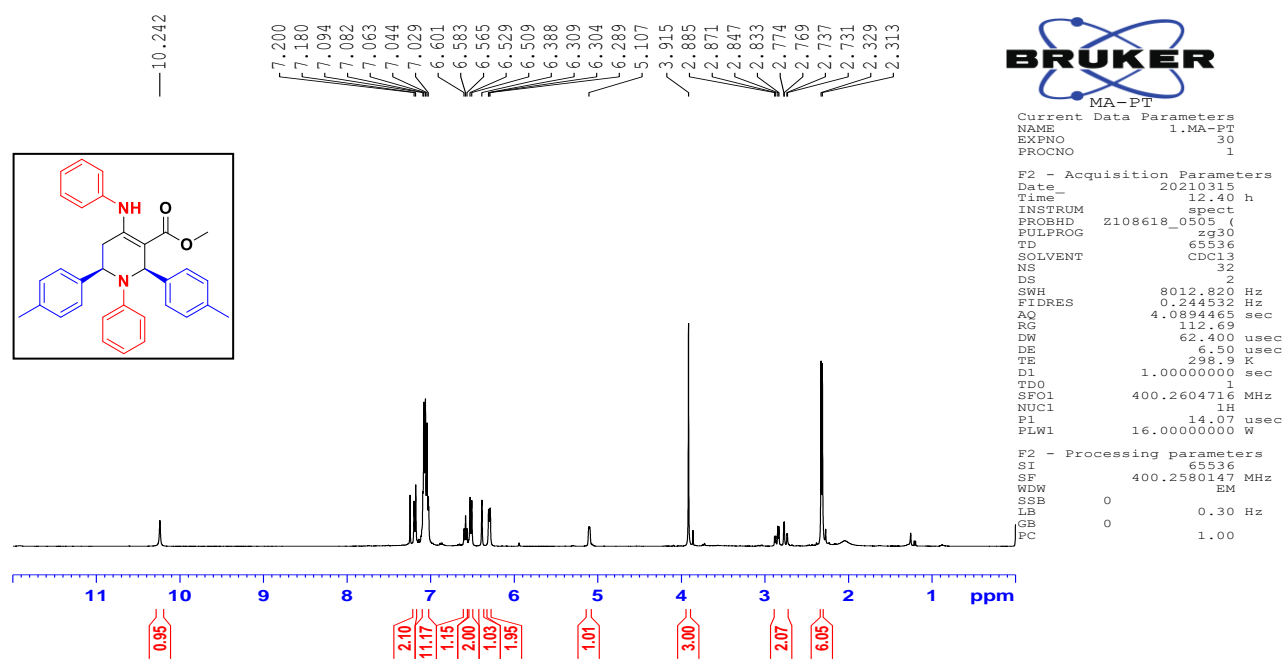

**Figure S42.** <sup>1</sup>H NMR (400 MHz) of compound **11g** in CDCl<sub>3</sub>

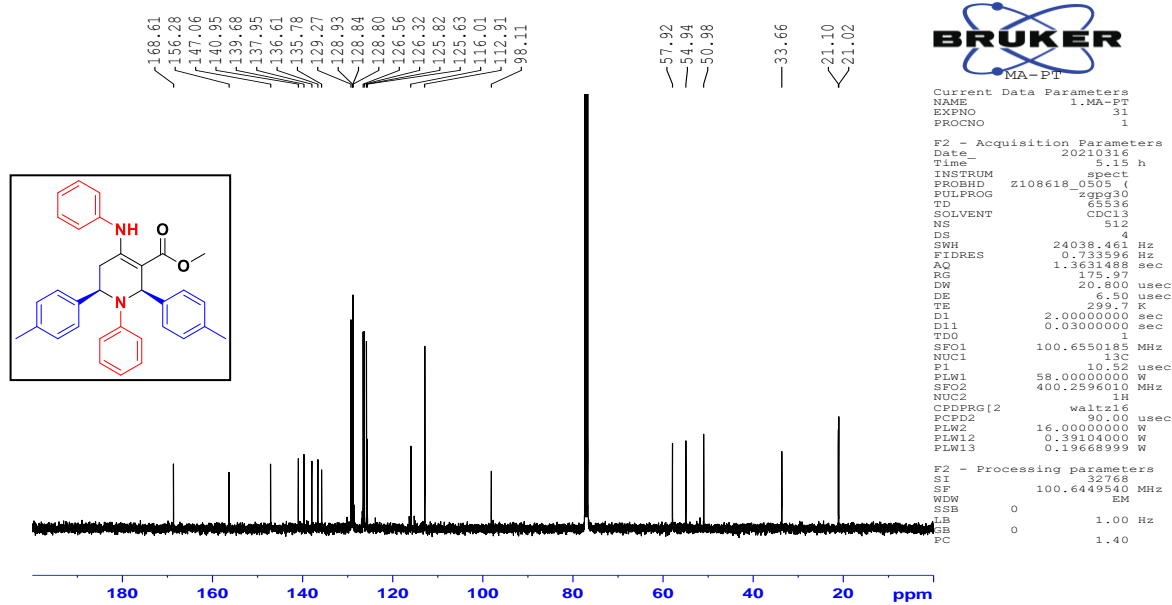

**Figure S43.** <sup>13</sup>C NMR Spectrum (100 MHz) of compound **11g** in CDCl<sub>3</sub>

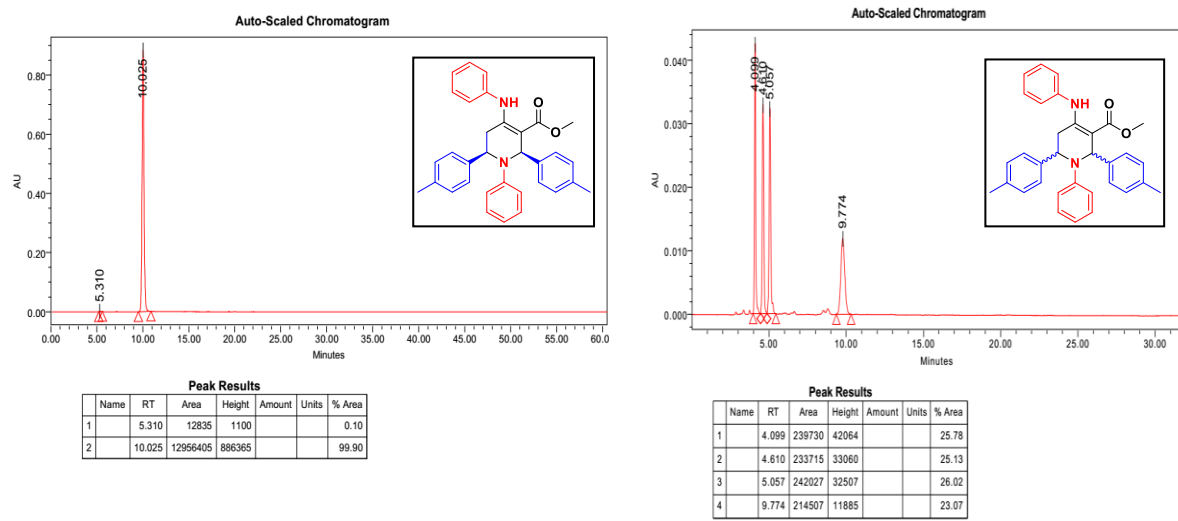

**Figure S44.** HPLC Chromatogram of compound **11g**

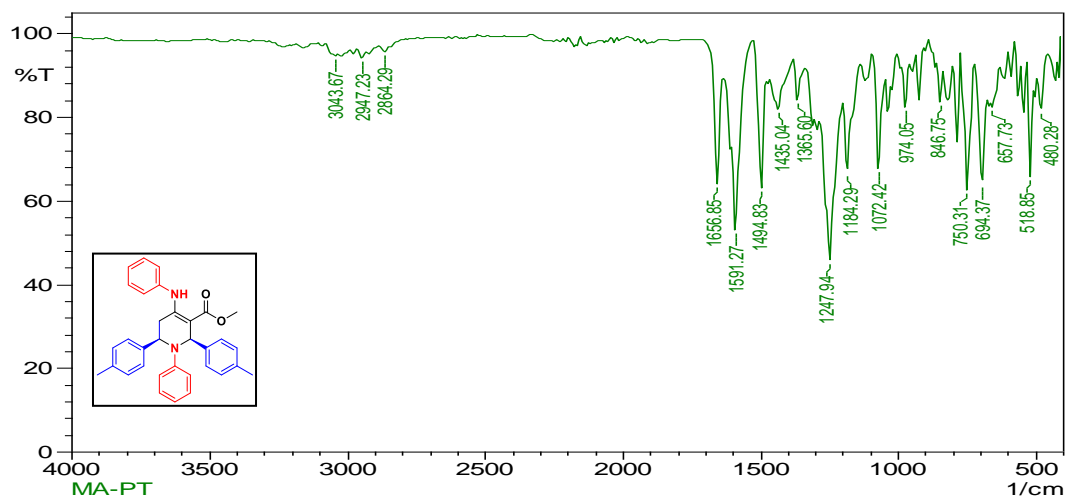

**Figure S45.** IR Spectrum of compound **11g**

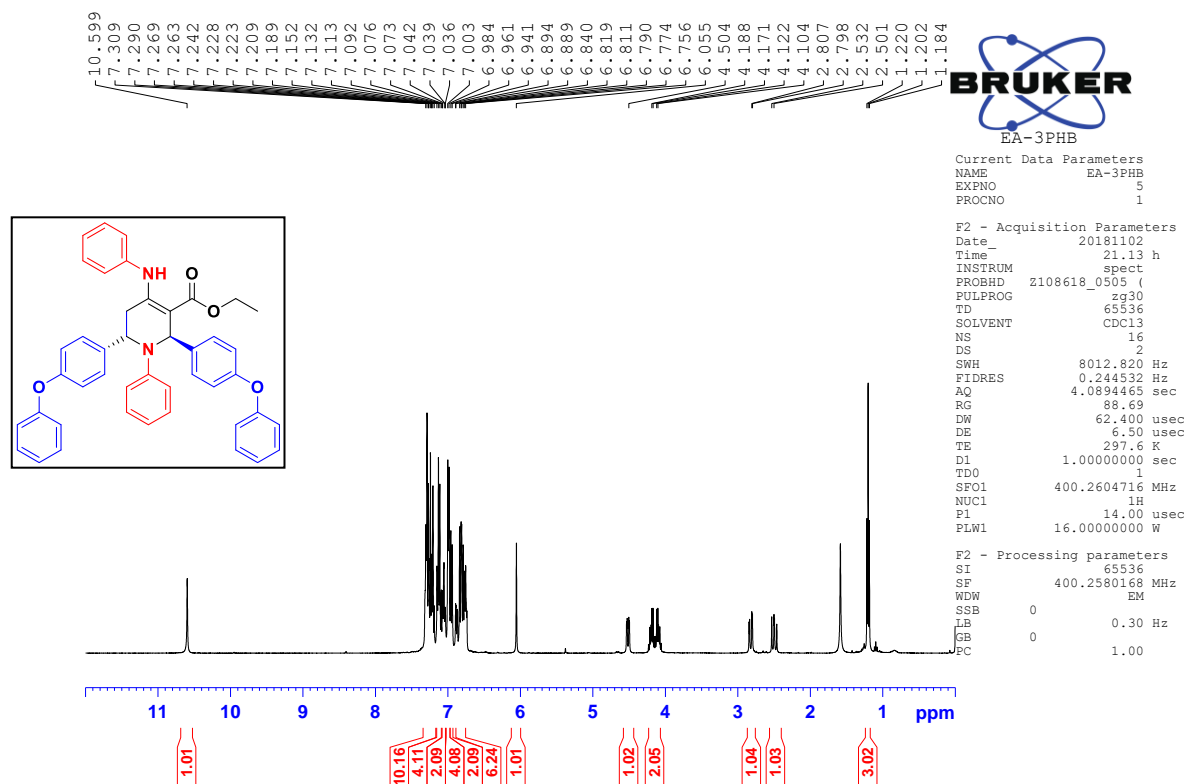

**Figure S46:** <sup>1</sup>H NMR (400 MHz) of compound **11h** in CDCl<sub>3</sub>

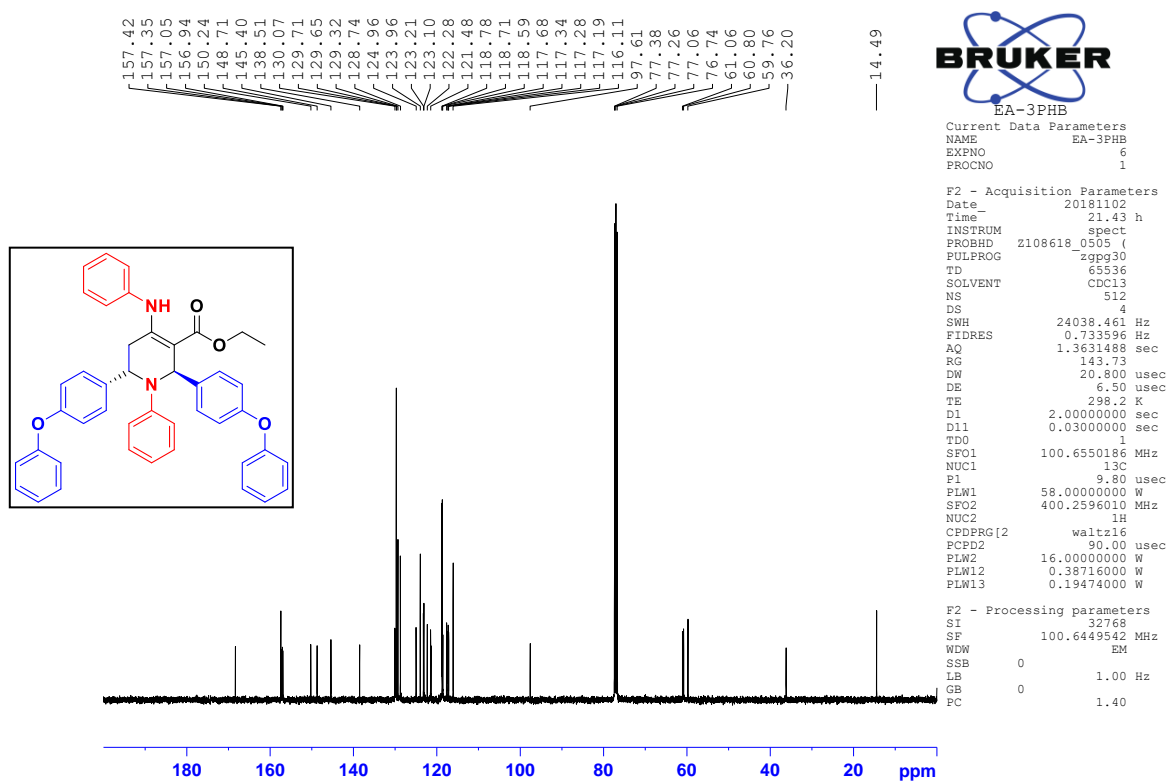

**Figure S47:** <sup>13</sup>C NMR Spectrum (100 MHz) of compound **11h** in CDCl<sub>3</sub>

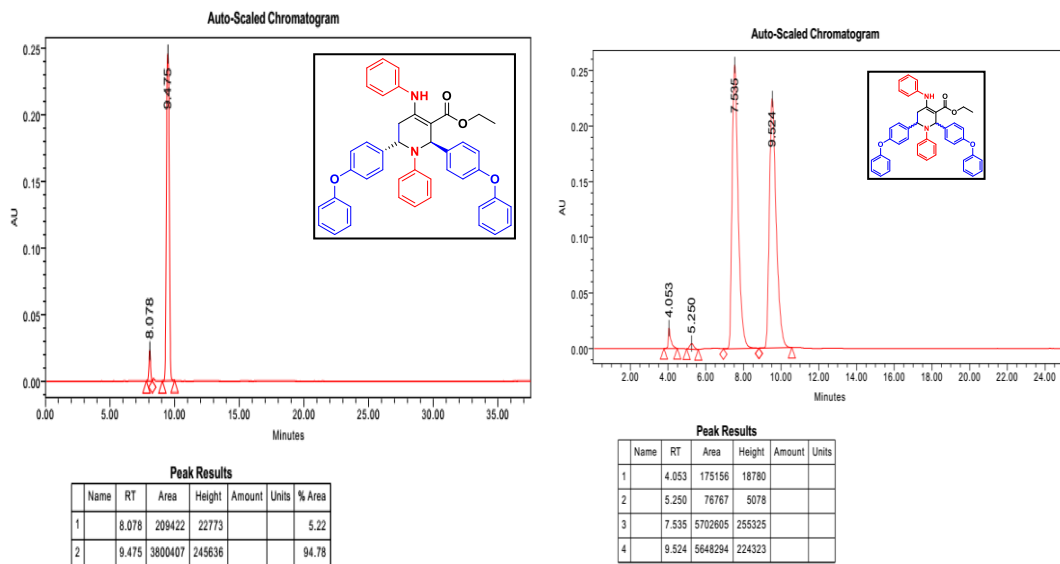

**Figure S48.** HPLC Chromatogram of compound **11h**

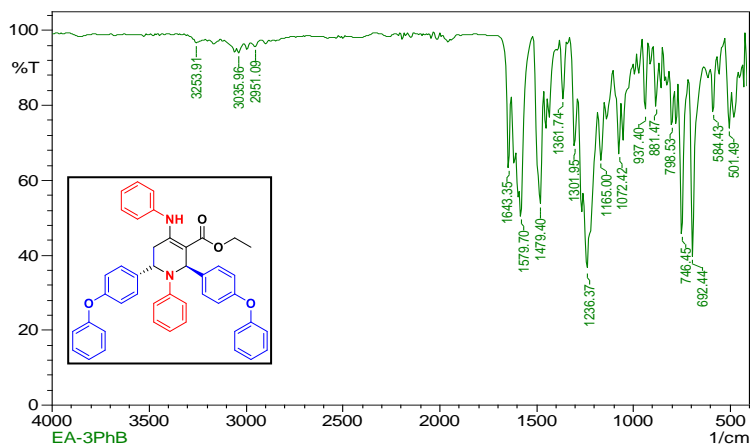

**Figure S49.** IR Spectrum of compound **11h**





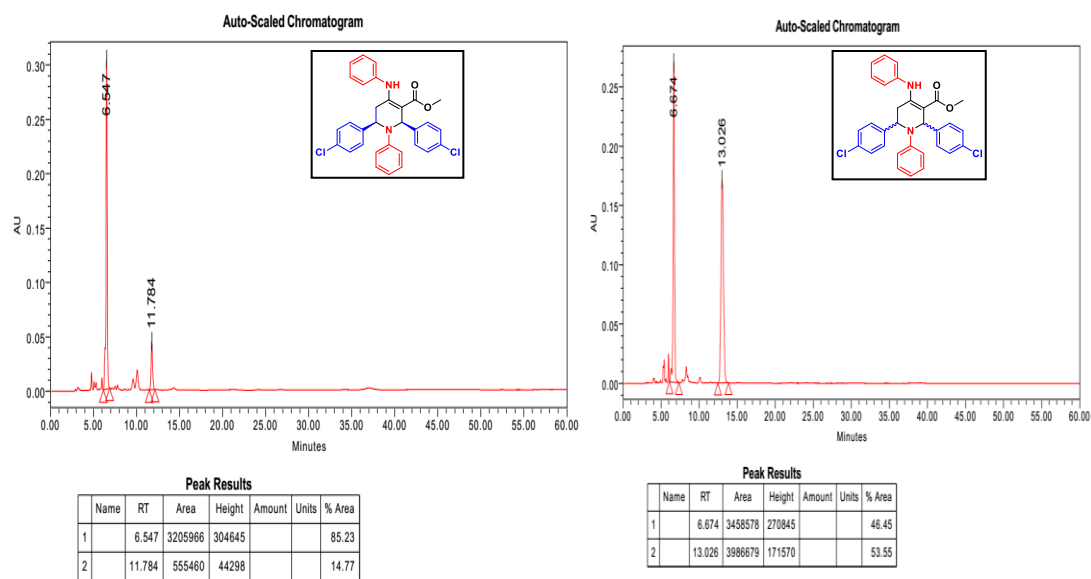

**Figure S52.** HPLC Chromatogram of compound **11i**

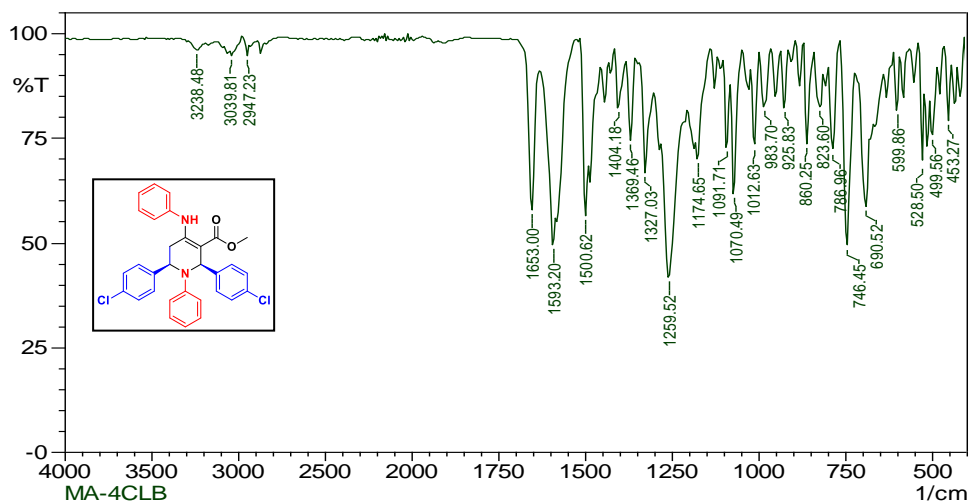

**Figure S53.** IR Spectrum of compound **11i**

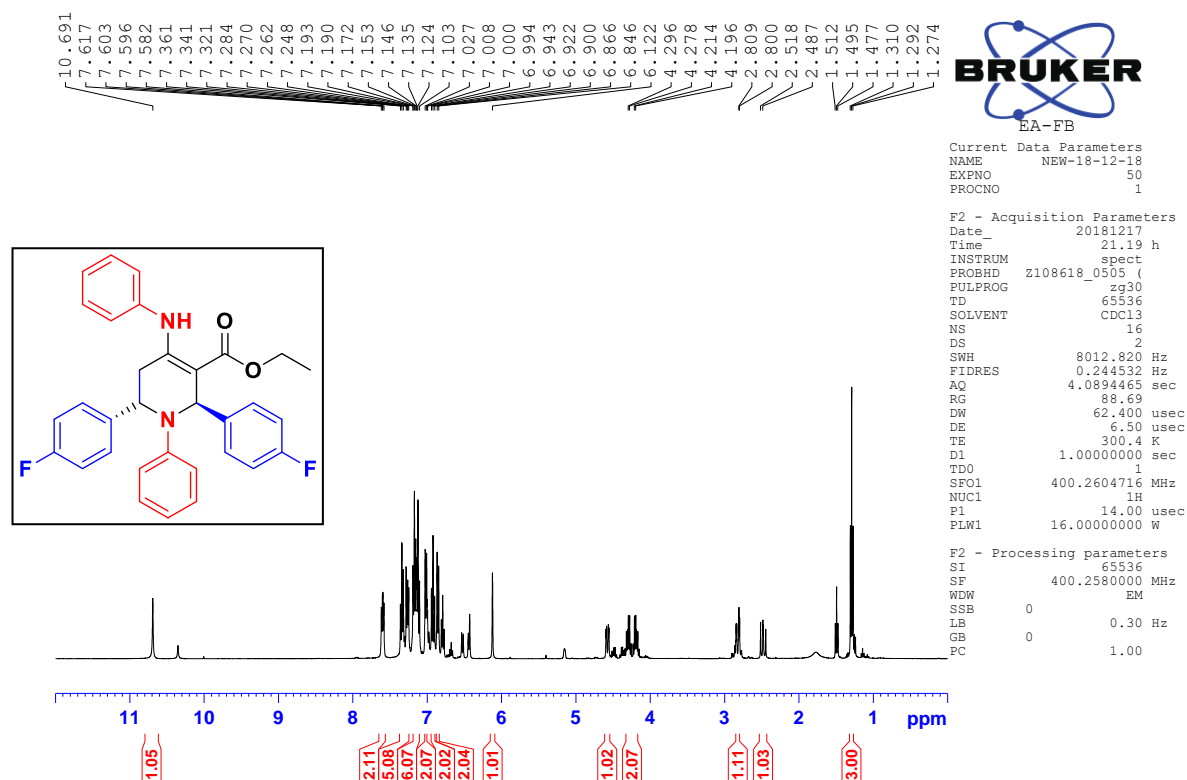

Figure S54. <sup>1</sup>H NMR (400 MHz) of compound **11j** in CDCl<sub>3</sub>

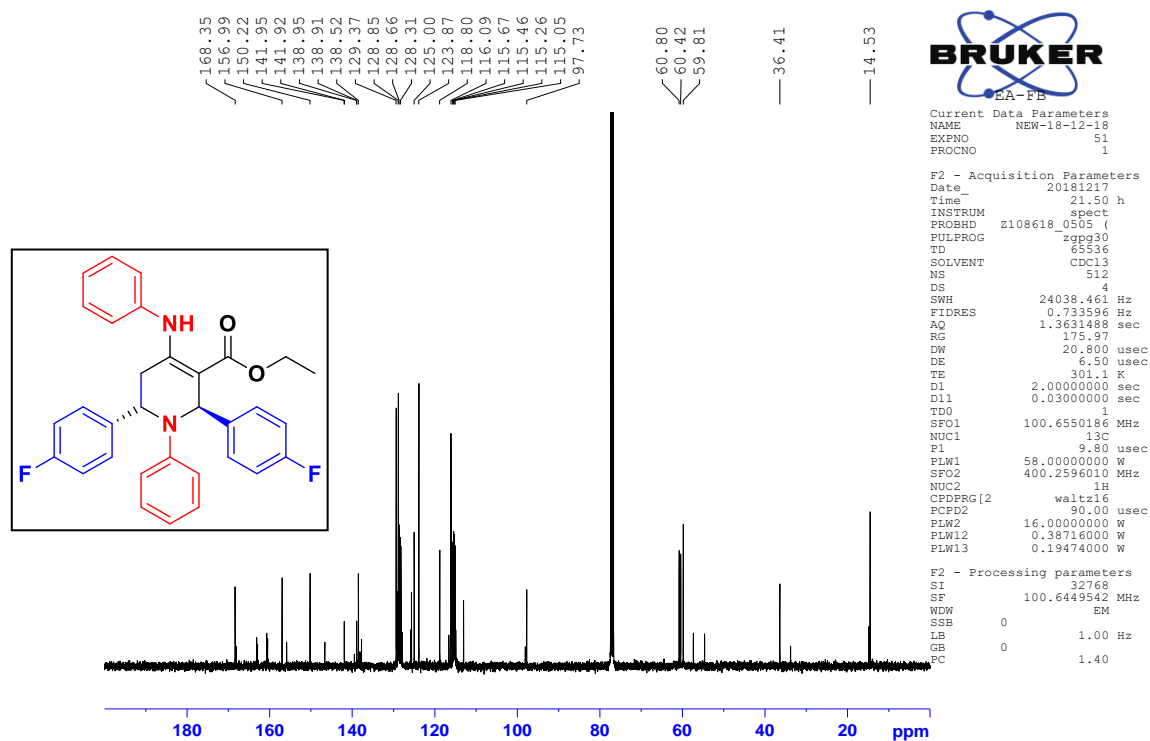

Figure S55. <sup>13</sup>C NMR Spectrum (100 MHz) of compound **11j** in CDCl<sub>3</sub>

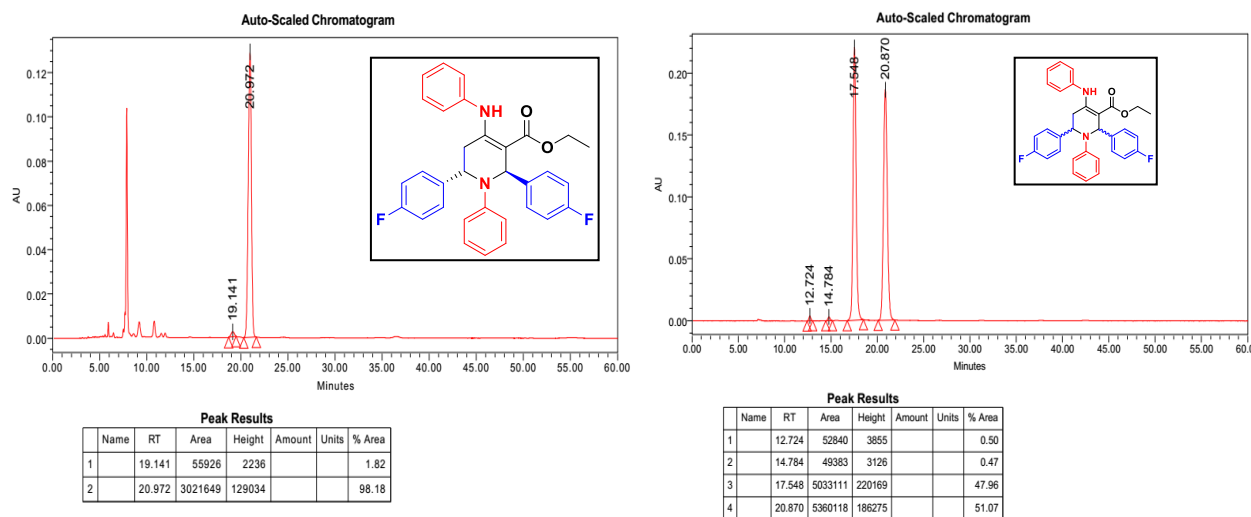

**Figure S56.** HPLC Chromatogram of compound **11j**

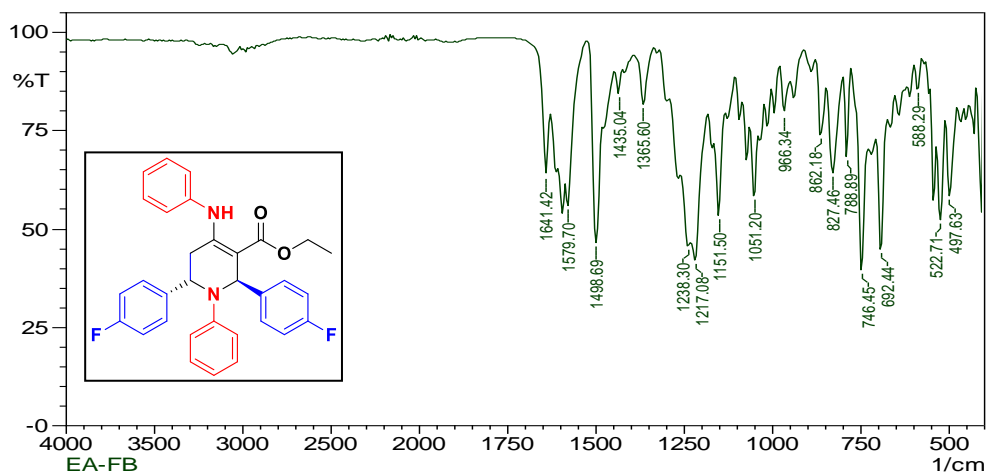

**Figure S57.** IR Spectrum of compound **11j**

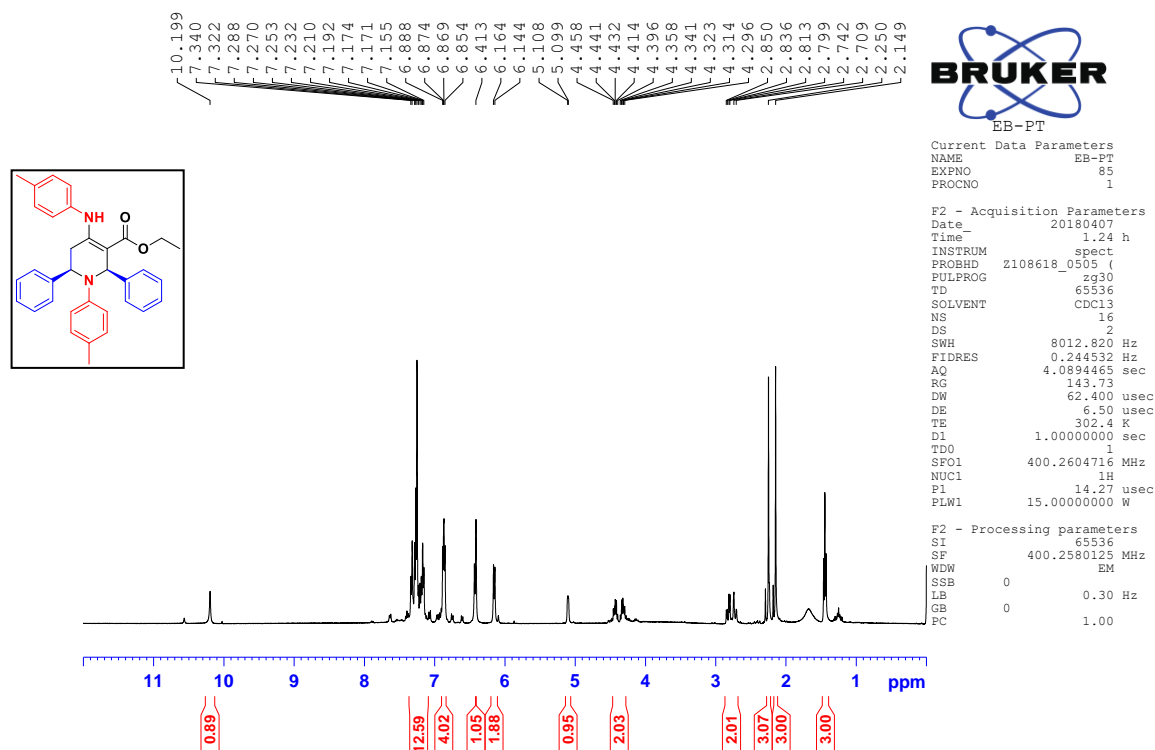

**Figure S58.** <sup>1</sup>H NMR (400 MHz) of compound **11k** in CDCl<sub>3</sub>

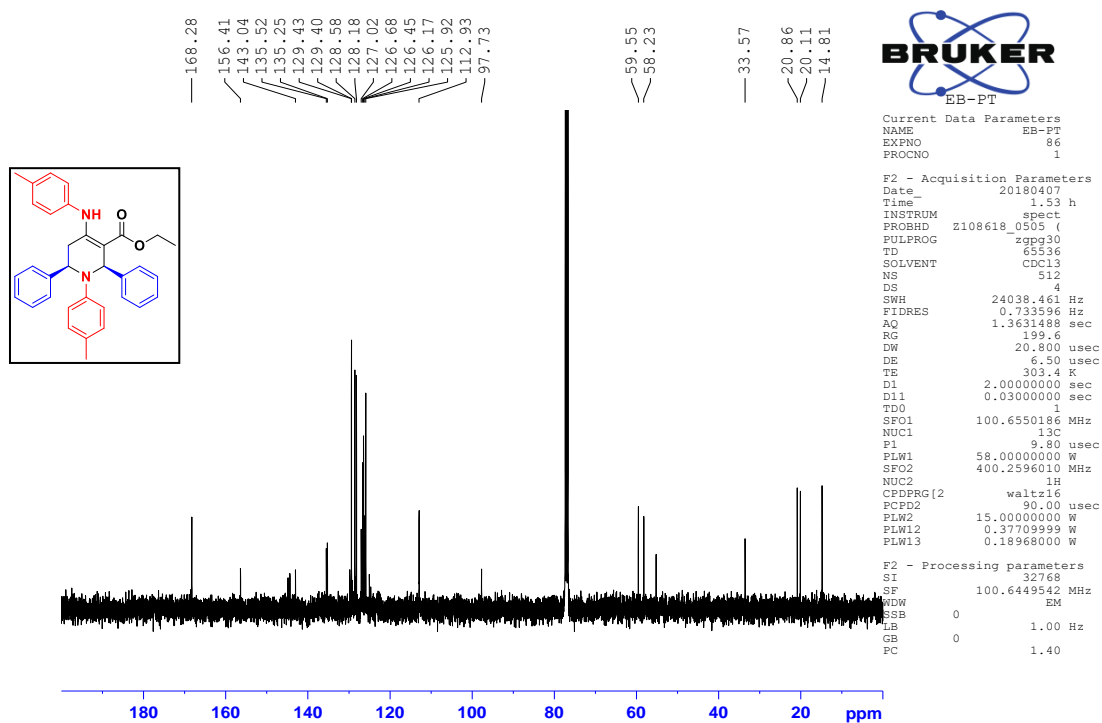

**Figure S59.** <sup>13</sup>C NMR Spectrum (100 MHz) of compound **11k** in CDCl<sub>3</sub>

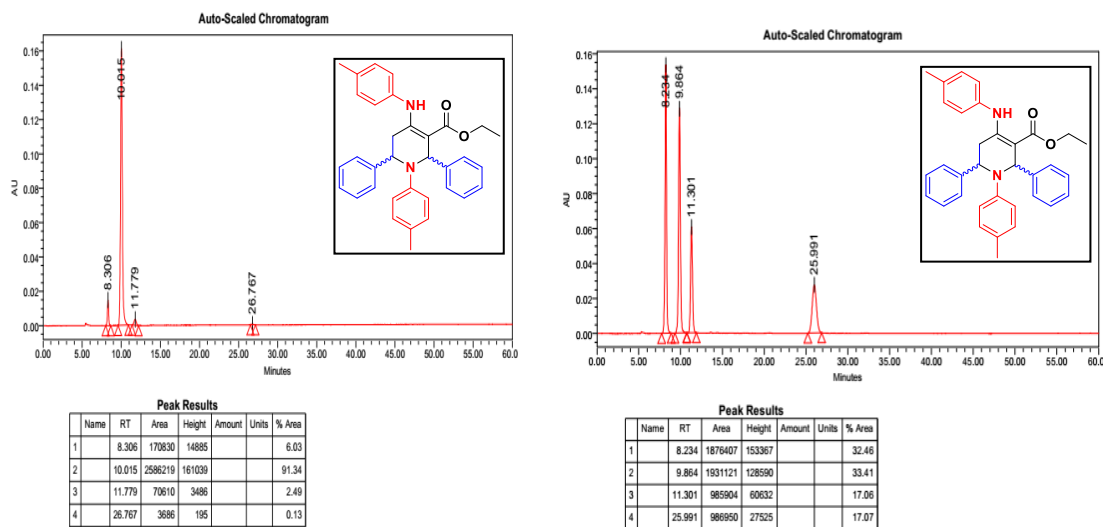

Figure S60. HPLC Chromatogram of compound **11k**

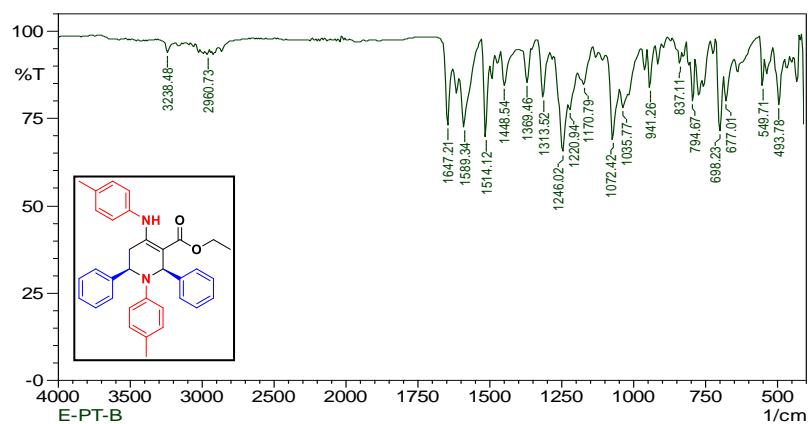

Figure S61. IR Spectrum of compound **11k**

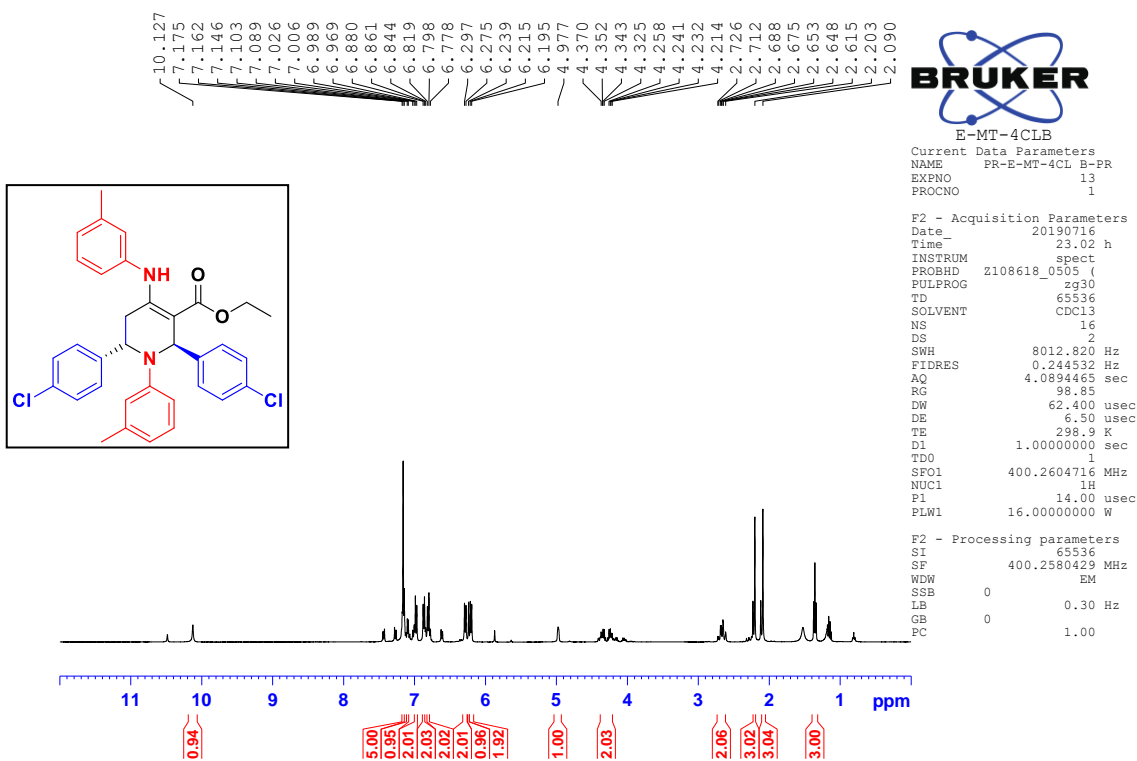

**Figure S62.** <sup>1</sup>H NMR (400 MHz) of compound **11l** in CDCl<sub>3</sub>

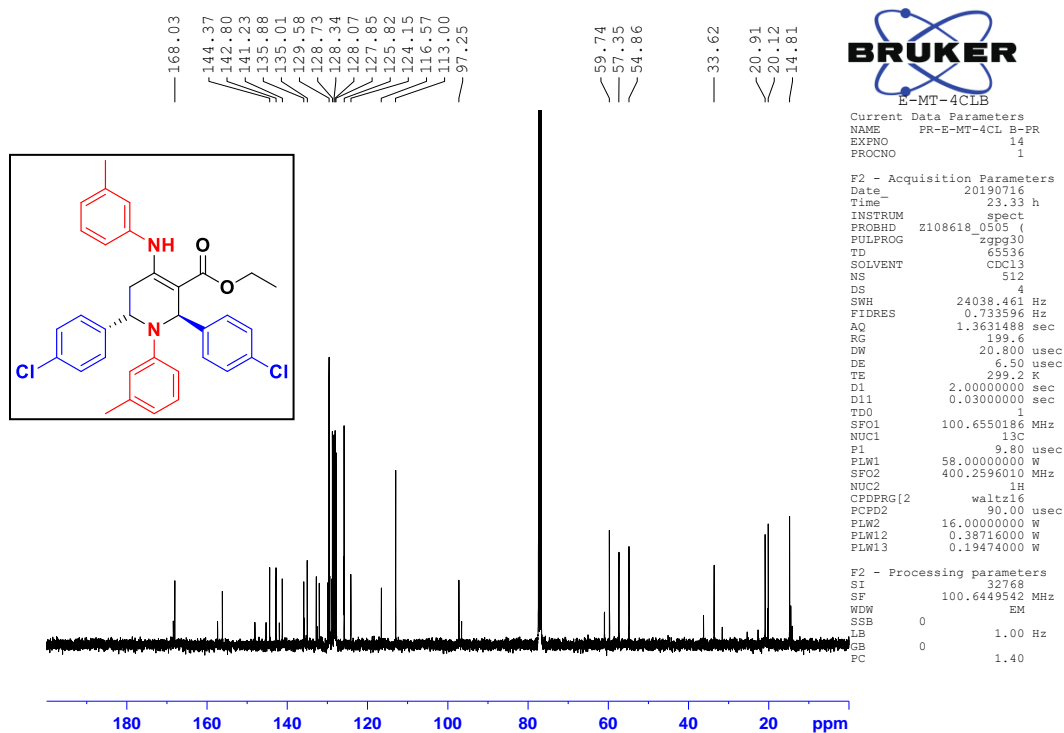

**Figure S63.** <sup>13</sup>C NMR Spectrum (100 MHz) of compound **11l** in CDCl<sub>3</sub>

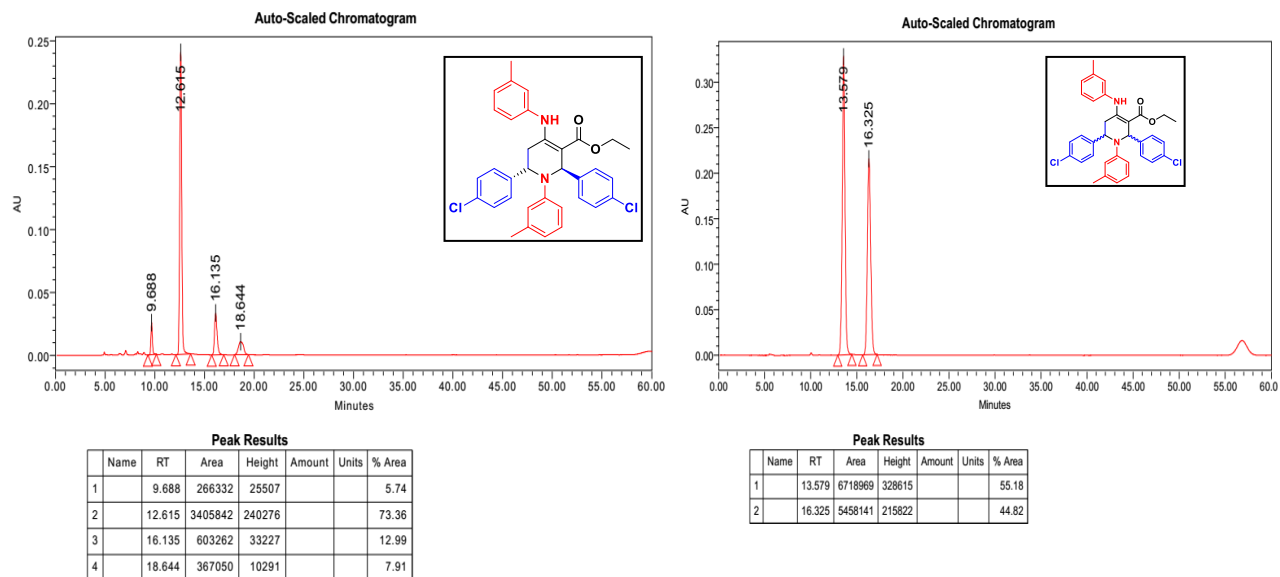

**Figure S64.** HPLC Chromatogram of compound **11l**

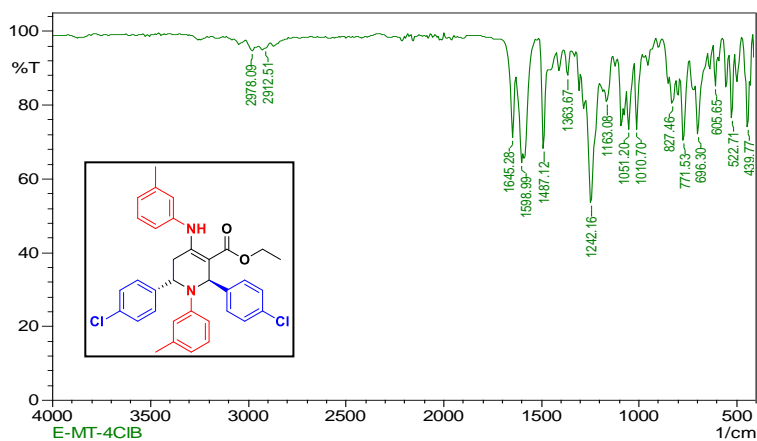

**Figure S65.** IR Spectrum of compound **11k**

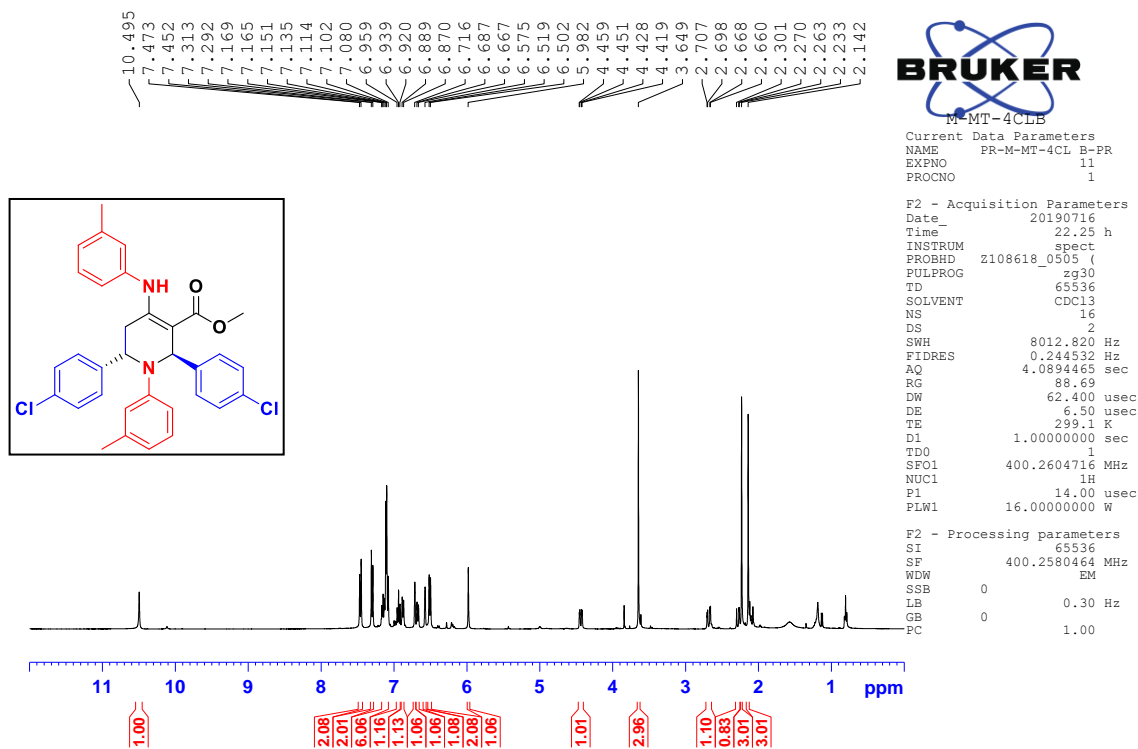

Figure S66. <sup>1</sup>H NMR (400 MHz) of compound **11m** in CDCl<sub>3</sub>

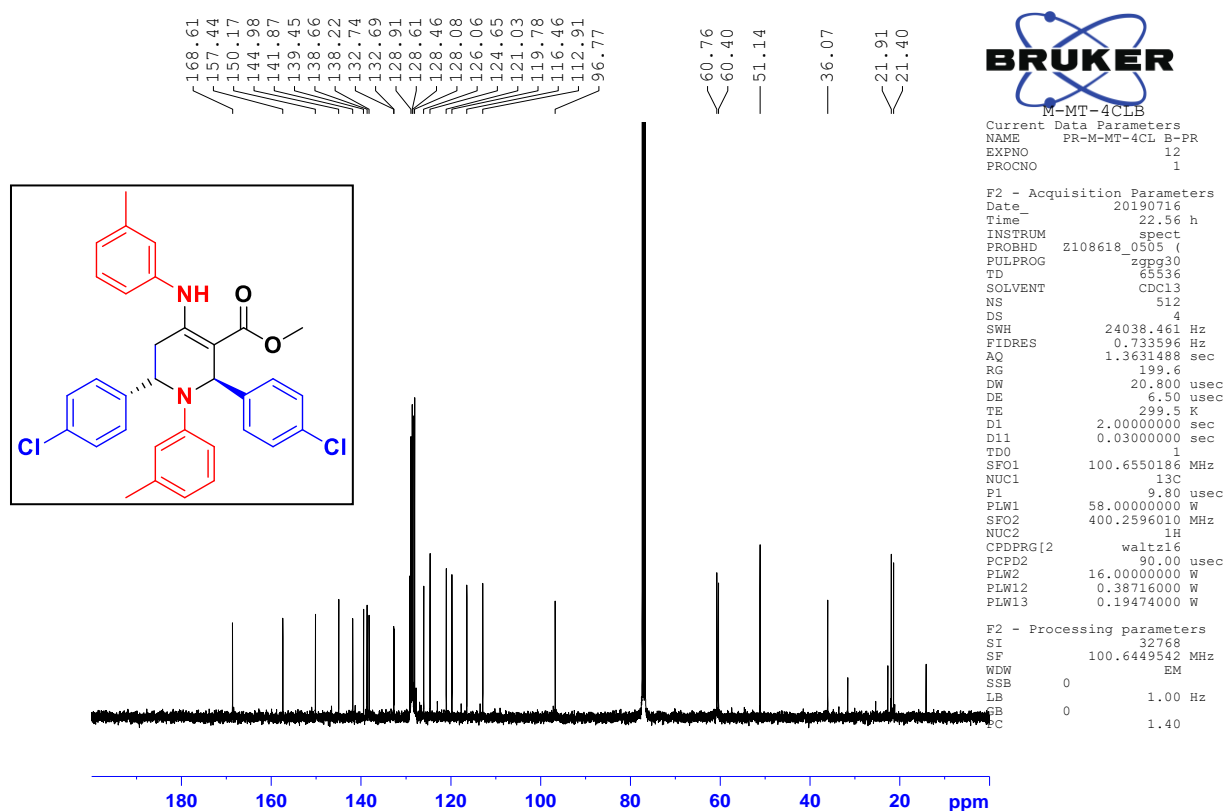

Figure S67. <sup>13</sup>C NMR Spectrum (100 MHz) of compound **11m** in CDCl<sub>3</sub>



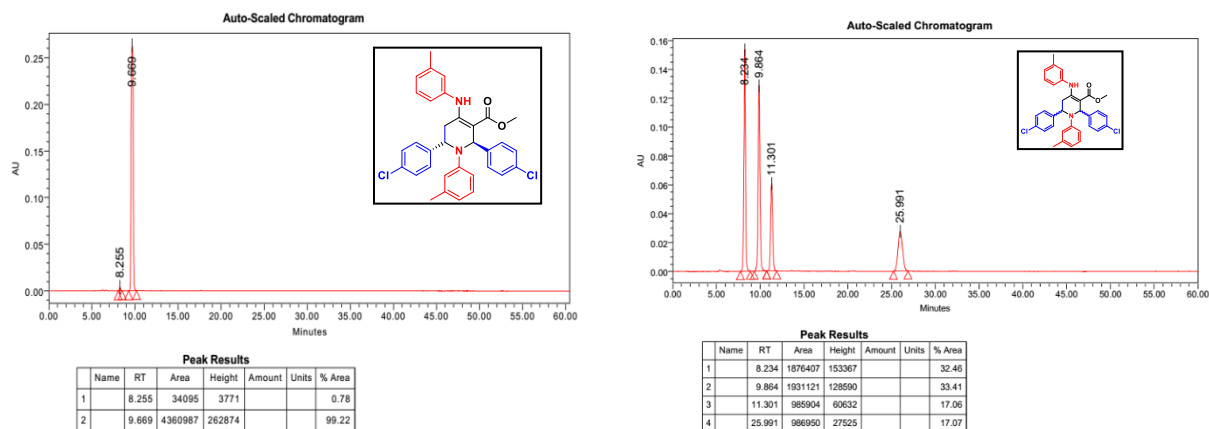

Figure S68. HPLC Chromatogram of compound **11m**

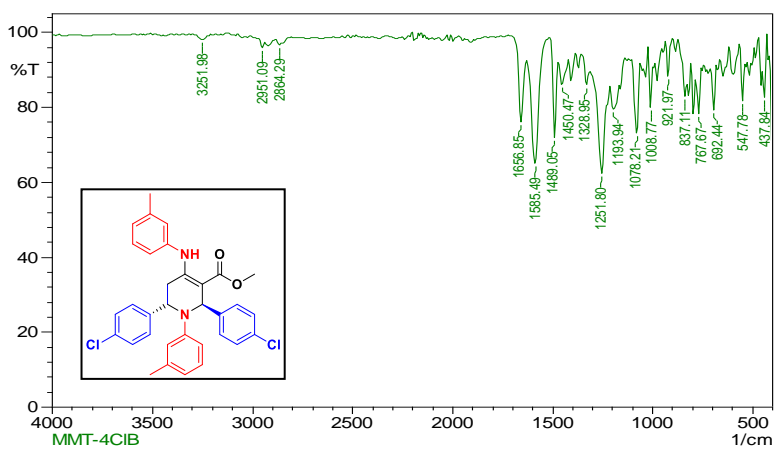

Figure S69. IR Spectrum of compound **11m**

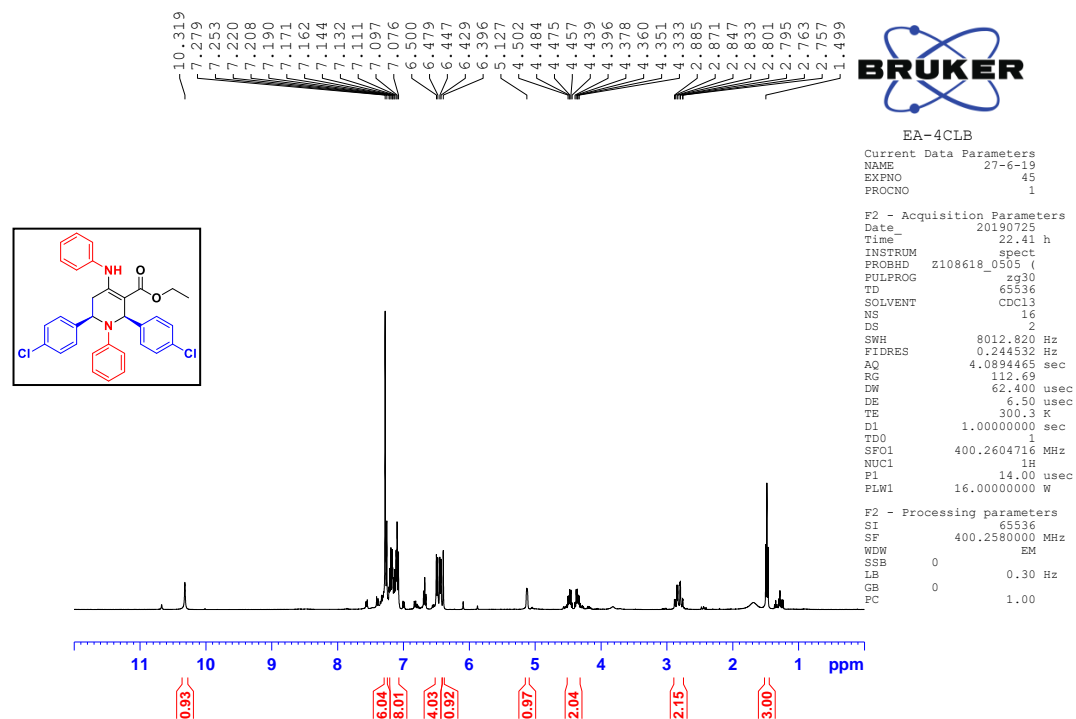

**Figure S70.**  $^1\text{H}$  NMR (400 MHz) of compound **11n** in  $\text{CDCl}_3$

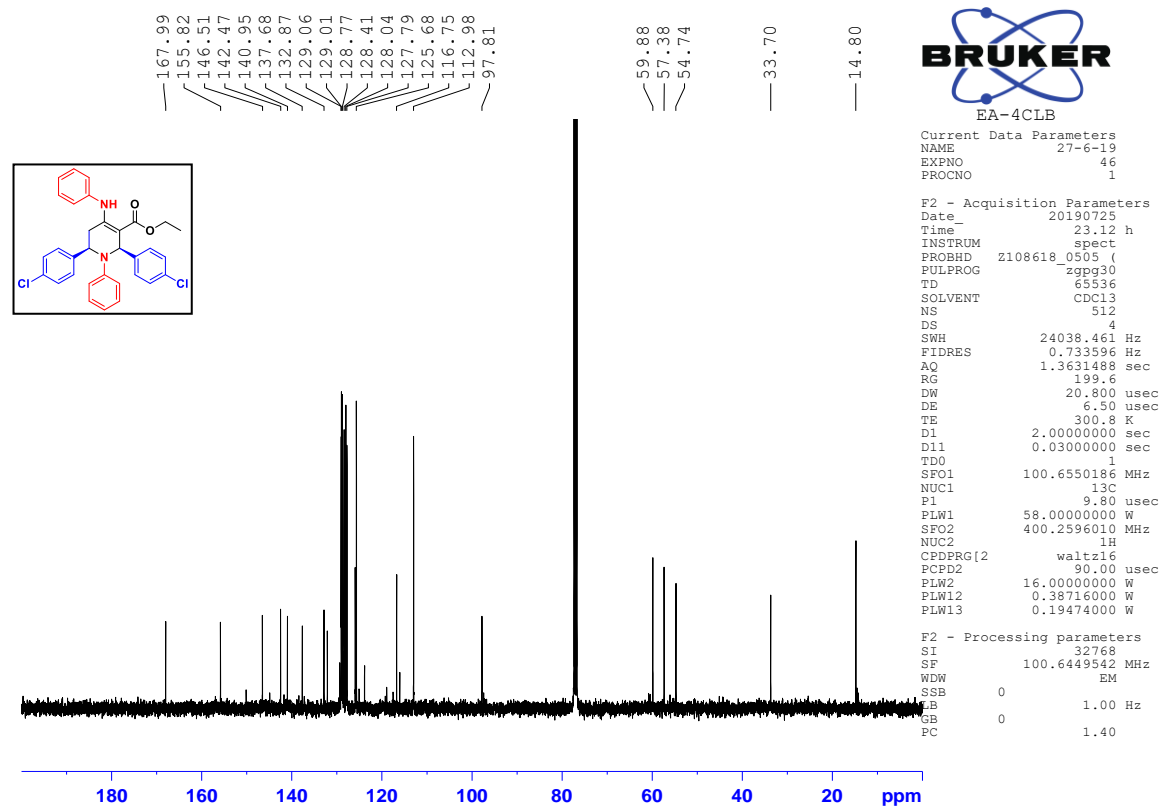

**Figure S71.**  $^{13}\text{C}$  NMR Spectrum (100 MHz) of compound **11n** in  $\text{CDCl}_3$

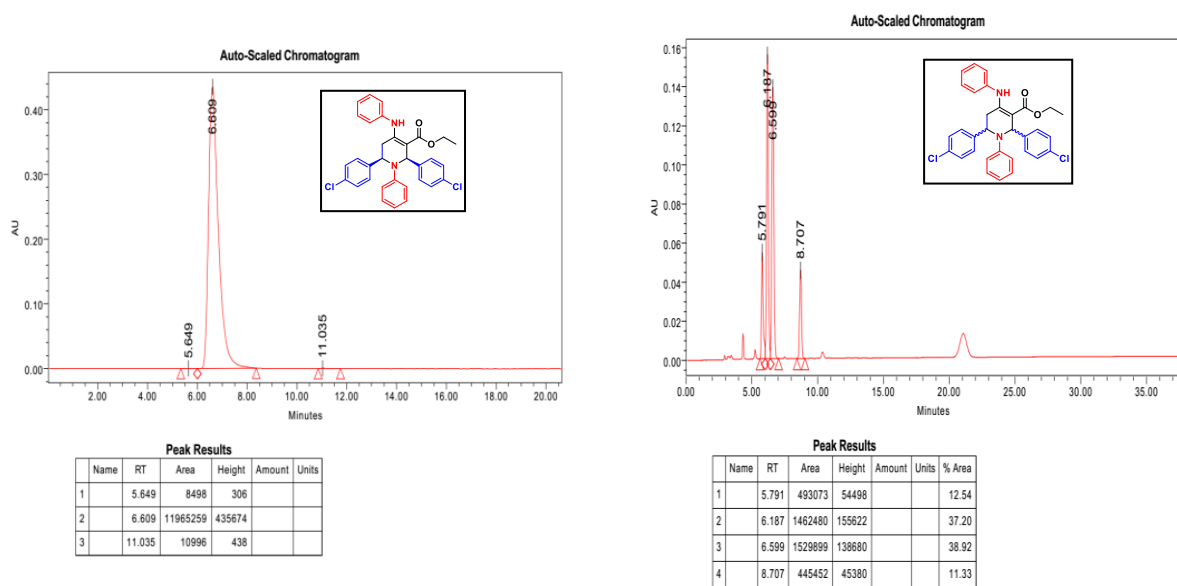

**Figure S72.** HPLC Chromatogram of compound **11n**

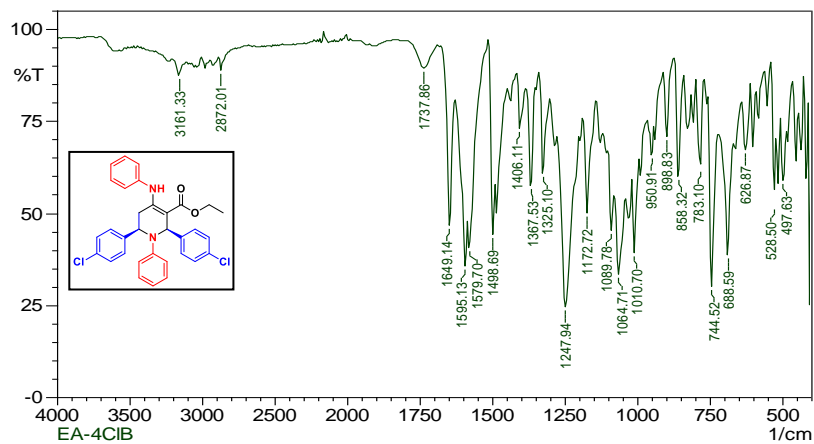

**Figure S73.** IR Spectrum of compound **11n**



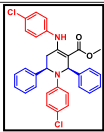

| Peak Results |      |        |         |        |        |       |        |
|--------------|------|--------|---------|--------|--------|-------|--------|
|              | Name | RT     | Area    | Height | Amount | Units | % Area |
| 1            |      | 18.067 | 619787  | 36917  |        |       | 8.16   |
| 2            |      | 19.476 | 927500  | 45043  |        |       | 12.21  |
| 3            |      | 21.204 | 6051721 | 234153 |        |       | 79.64  |

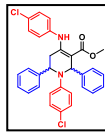

|   | Name | RT     | Area    | Height | Amount | Units | % Area |
|---|------|--------|---------|--------|--------|-------|--------|
| 1 |      | 12.724 | 52840   | 3855   |        |       | 0.50   |
| 2 |      | 14.784 | 49383   | 3126   |        |       | 0.47   |
| 3 |      | 17.548 | 5033111 | 220169 |        |       | 47.96  |
| 4 |      | 20.870 | 5360118 | 186275 |        |       | 51.07  |

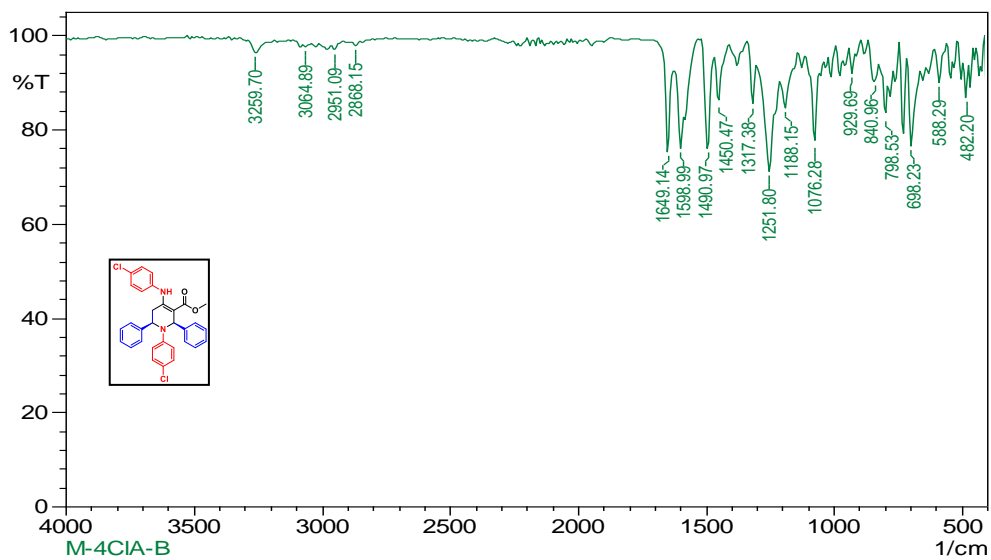

Supplement: s1 [file s1]
